# Supplementary material for: Cascade reaction of alkynols with 1-(2-aminophenyl)prop-2-ynols to form a fused 5,5,6-tricyclic system: formation of four bonds in a single reaction
Source: Royal Society of Chemistry journal article supplement (doi:10.1039/c7cc04126h), 2017-01-01

# Supporting Information

## Cascade reaction of alkynols and 1-(2-aminophenyl)prop-2-ynols to form a fused 5,5,6-tricyclic system: formation of four bonds in a single reaction

Xiao-Feng Mao, Xiao-Ping Zhu, Liang-Liang Jiang, Deng-Yuan Li and Pei-Nian Liu\*

*Shanghai Key Laboratory of Functional Materials Chemistry, Key Lab for Advanced Materials and Institute of Fine Chemicals, East China University of Science and Technology, Meilong Road 130, Shanghai 200237, China  
E-mail: liupn@ecust.edu.cn*

### Table of contents

|                                                                                                            |     |
|------------------------------------------------------------------------------------------------------------|-----|
| 1. General Information .....                                                                               | S2  |
| 2. General procedure for the cascade annulation of alkynols with 1-(2-aminophenyl)prop-2-ynols .....       | S2  |
| 3. Crystal data and structure refinement of product <b>3a</b> , <b>3f</b> and <b>4</b> .....               | S3  |
| 4. Analytical data for products .....                                                                      | S7  |
| 5. Copies of the <sup>1</sup> H NMR, <sup>13</sup> C NMR and <sup>19</sup> F NMR spectra of products ..... | S19 |

## 1 General Information.

All manipulations were carried out under a nitrogen or argon atmosphere using standard Schlenk techniques, unless otherwise stated. Solvents were distilled under nitrogen from sodium-benzophenone (THF, toluene, dioxane) or calcium hydride (MeCN, CH<sub>3</sub>NO<sub>2</sub>, DMF, DCE). Other chemicals were obtained from commercial sources, and were used without further purification. Chemical shifts ( $\delta$ , ppm) in the <sup>1</sup>H NMR spectra were internally referenced to DMSO-d<sup>6</sup> ( $\delta$  = 39.52 ppm). Chemical shifts in <sup>13</sup>C NMR spectra were internally referenced to CDCl<sub>3</sub> ( $\delta$  = 77.16 ppm).

## 2 General procedure for the cascade annulation of alkynols with 1-(2-aminophenyl)prop-2-ynols.

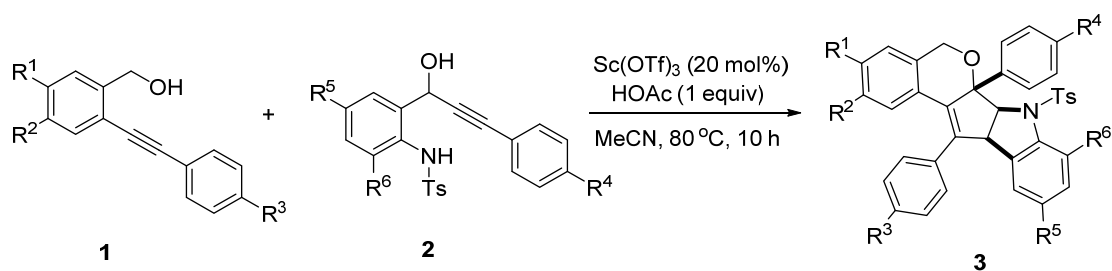

To a mixture of internal alkynol **1a** (0.2 mmol) and N-(2-(1-hydroxy-3-phenylprop-2-yn-1-yl)phenyl)-4-methylbenzenesulfonamide **2a** (0.24 mmol) in CH<sub>3</sub>CN was added the Scandium trifluoromethanesulfonate (0.04mmol, 20 mol%) and HOAc (0.2 mmol, 1 equiv) under Ar. The reaction mixture was stirred at 80 °C for 10 hours and the progress was monitored using TLC detection. After completion of present reaction, the solvent was evaporated under reduced pressure. After that the crude product was passed through flash column chromatography on silica gel to afford the desired products.

### 3. Crystal data and structure refinement of product 3a, 3f and 4.

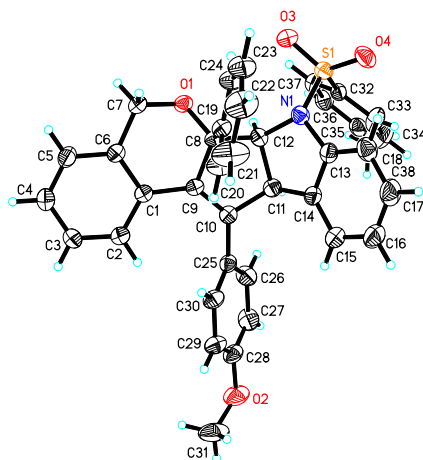

**Figure S1.** The ORTEP diagram of product **3a**.

**Table S1.** Crystal data and structure refinement for **3a**.

|                                 |                                                                   |                              |
|---------------------------------|-------------------------------------------------------------------|------------------------------|
| Identification code             | <b>3a</b>                                                         |                              |
| CCDC Number                     | 1552567                                                           |                              |
| Empirical formula               | $C_{38}H_{31}NO_4S$                                               |                              |
| Formula weight                  | 597.70                                                            |                              |
| Temperature                     | 293(2) K                                                          |                              |
| Wavelength                      | 0.71073 Å                                                         |                              |
| Crystal system                  | Monoclinic                                                        |                              |
| Space group                     | C 2/c                                                             |                              |
| Unit cell dimensions            | $a = 35.535(6)$ Å                                                 | $\alpha = 90^\circ$ .        |
|                                 | $b = 8.3152(14)$ Å                                                | $\beta = 126.844(3)^\circ$ . |
|                                 | $c = 26.015(4)$ Å                                                 | $\gamma = 90^\circ$ .        |
| Volume                          | $6151.8(18)$ Å <sup>3</sup>                                       |                              |
| Z                               | 8                                                                 |                              |
| Density (calculated)            | 1.291 Mg/m <sup>3</sup>                                           |                              |
| Absorption coefficient          | 0.148 mm <sup>-1</sup>                                            |                              |
| F(000)                          | 2512                                                              |                              |
| Crystal size                    | 0.210 x 0.170 x 0.140 mm <sup>3</sup>                             |                              |
| Theta range for data collection | 1.432 to 25.999°.                                                 |                              |
| Index ranges                    | $-41 \leq h \leq 43$ , $-10 \leq k \leq 9$ , $-32 \leq l \leq 32$ |                              |
| Reflections collected           | 18014                                                             |                              |

|                                   |                                             |
|-----------------------------------|---------------------------------------------|
| Independent reflections           | 6046 [R(int) = 0.0458]                      |
| Completeness to theta = 25.242°   | 100.0 %                                     |
| Absorption correction             | Semi-empirical from equivalents             |
| Max. and min. transmission        | 0.7456 and 0.6283                           |
| Refinement method                 | Full-matrix least-squares on F <sup>2</sup> |
| Data / restraints / parameters    | 6046 / 0 / 399                              |
| Goodness-of-fit on F <sup>2</sup> | 1.035                                       |
| Final R indices [I>2sigma(I)]     | R1 = 0.0477, wR2 = 0.1245                   |
| R indices (all data)              | R1 = 0.0750, wR2 = 0.1392                   |
| Extinction coefficient            | n/a                                         |
| Largest diff. peak and hole       | 0.235 and -0.275 e.Å <sup>-3</sup>          |

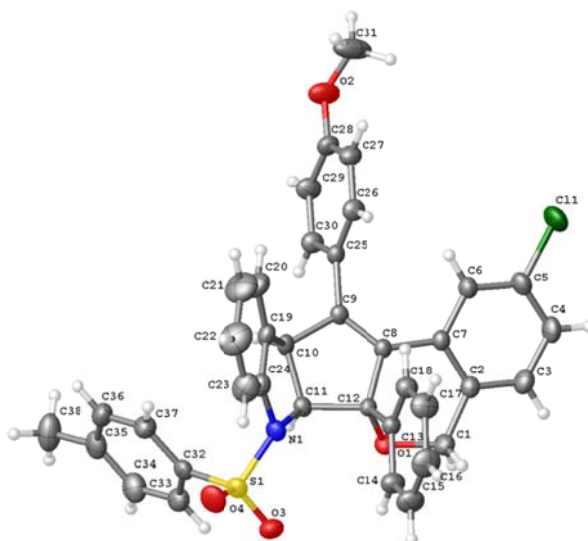

**Figure S2.** The ORTEP diagram of product **3f**.

**Table S2.** Crystal data and structure refinement for **3f**.

|                      |                                                     |          |
|----------------------|-----------------------------------------------------|----------|
| Identification code  | <b>3f</b>                                           |          |
| CCDC Number          | 1552568                                             |          |
| Empirical formula    | C <sub>38</sub> H <sub>30</sub> ClNO <sub>4</sub> S |          |
| Formula weight       | 632.14                                              |          |
| Temperature          | 296.15 K                                            |          |
| Wavelength           | 0.71073 Å                                           |          |
| Crystal system       | Orthorhombic                                        |          |
| Space group          | P b c a                                             |          |
| Unit cell dimensions | a = 11.9530(11) Å                                   | α = 90°. |
|                      | b = 16.5209(14) Å                                   | β = 90°. |

|                                        |                                                                    |                       |
|----------------------------------------|--------------------------------------------------------------------|-----------------------|
|                                        | $c = 31.646(3) \text{ \AA}$                                        | $\gamma = 90^\circ$ . |
| Volume                                 | $6249.3(9) \text{ \AA}^3$                                          |                       |
| Z                                      | 8                                                                  |                       |
| Density (calculated)                   | $1.344 \text{ Mg/m}^3$                                             |                       |
| Absorption coefficient                 | $0.232 \text{ mm}^{-1}$                                            |                       |
| F(000)                                 | 2640                                                               |                       |
| Crystal size                           | $0.33 \times 0.3 \times 0.28 \text{ mm}^3$                         |                       |
| Theta range for data collection        | $2.135$ to $30.605^\circ$ .                                        |                       |
| Index ranges                           | $-15 \leq h \leq 17$ , $-23 \leq k \leq 23$ , $-45 \leq l \leq 40$ |                       |
| Reflections collected                  | 60012                                                              |                       |
| Independent reflections                | 9594 [R(int) = 0.0505]                                             |                       |
| Completeness to theta = $25.242^\circ$ | 100.0 %                                                            |                       |
| Absorption correction                  | Semi-empirical from equivalents                                    |                       |
| Max. and min. transmission             | 0.7461 and 0.6800                                                  |                       |
| Refinement method                      | Full-matrix least-squares on $F^2$                                 |                       |
| Data / restraints / parameters         | 9594 / 0 / 408                                                     |                       |
| Goodness-of-fit on $F^2$               | 1.054                                                              |                       |
| Final R indices [ $I > 2\sigma(I)$ ]   | R1 = 0.0692, wR2 = 0.1460                                          |                       |
| R indices (all data)                   | R1 = 0.1270, wR2 = 0.1787                                          |                       |
| Extinction coefficient                 | n/a                                                                |                       |
| Largest diff. peak and hole            | 0.519 and $-0.570 \text{ e.\AA}^{-3}$                              |                       |

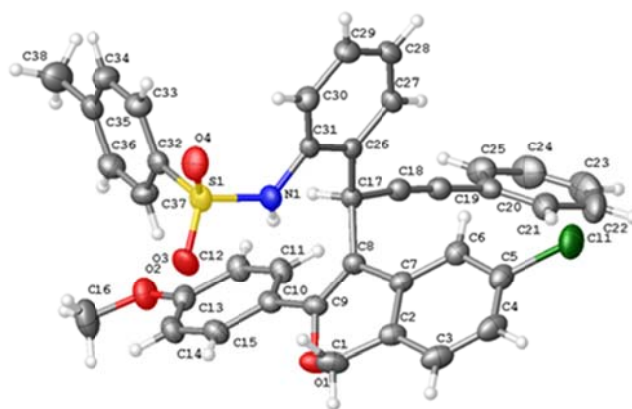

**Figure S3.** The ORTEP diagram of product **4**.

**Table S3.** Crystal data and structure refinement for **4**

Identification code

**4**

|                                   |                                             |                             |
|-----------------------------------|---------------------------------------------|-----------------------------|
| CCDC Number                       | 1552569                                     |                             |
| Empirical formula                 | $C_{38}H_{30}ClNO_4S$                       |                             |
| Formula weight                    | 632.14                                      |                             |
| Temperature                       | 296 K                                       |                             |
| Wavelength                        | 0.71073 Å                                   |                             |
| Crystal system                    | Triclinic                                   |                             |
| Space group                       | P -1                                        |                             |
| Unit cell dimensions              | a = 10.0712(10) Å                           | $\alpha=104.565(2)^\circ$ . |
|                                   | b = 13.1339(13) Å                           | $\beta=104.140(2)^\circ$ .  |
|                                   | c = 13.3013(14) Å                           | $\gamma=101.177(2)^\circ$ . |
| Volume                            | 1589.0(3) Å <sup>3</sup>                    |                             |
| Z                                 | 2                                           |                             |
| Density (calculated)              | 1.321 Mg/m <sup>3</sup>                     |                             |
| Absorption coefficient            | 0.228 mm <sup>-1</sup>                      |                             |
| F(000)                            | 660                                         |                             |
| Crystal size                      | 0.15 x 0.1 x 0.05 mm <sup>3</sup>           |                             |
| Theta range for data collection   | 1.663 to 28.311°.                           |                             |
| Index ranges                      | -13<=h<=7, -17<=k<=17, -17<=l<=17           |                             |
| Reflections collected             | 13986                                       |                             |
| Independent reflections           | 7882 [R(int) = 0.0267]                      |                             |
| Completeness to theta = 25.242°   | 100.0 %                                     |                             |
| Absorption correction             | Semi-empirical from equivalents             |                             |
| Max. and min. transmission        | 0.7457 and 0.6814                           |                             |
| Refinement method                 | Full-matrix least-squares on F <sup>2</sup> |                             |
| Data / restraints / parameters    | 7882 / 0 / 408                              |                             |
| Goodness-of-fit on F <sup>2</sup> | 0.982                                       |                             |
| Final R indices [I>2sigma(I)]     | R1 = 0.0462, wR2 = 0.1067                   |                             |
| R indices (all data)              | R1 = 0.1092, wR2 = 0.1326                   |                             |
| Extinction coefficient            | n/a                                         |                             |
| Largest diff. peak and hole       | 0.213 and -0.322 e.Å <sup>-3</sup>          |                             |

#### 4. Analytical data for products.

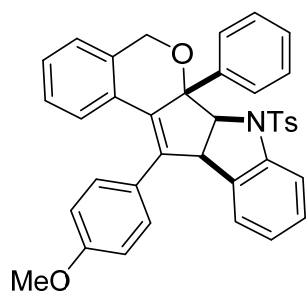

12-(4-Methoxyphenyl)-6a-phenyl-7-tosyl-6a,6b,7,11b-tetrahydro-5H-isochromeno[4',3':4,5]cyclopenta[1,2-b]indole (**3a**). The compound was prepared from (2-((4-methoxyphenyl)ethynyl)phenyl)methanol and N-(2-(1-hydroxy-3-phenylprop-2-yn-1-yl)phenyl)-4-methylbenzenesulfonamide following the general procedure. The product **3a** was obtained in 68% yield as a white solid after column chromatography (eluent = petroleum ether/ethyl acetate 10:1 v/v); Mp: 145-148 °C;  $^1\text{H}$  NMR (400 MHz,  $d^6$ -DMSO, 25 °C):  $\delta$  7.47-7.50 (m, 5H), 7.30-7.32 (m, 1H), 7.23-7.26 (m, 3H), 7.06-7.13 (m, 5H), 6.91-6.96 (m, 4H), 6.79-6.85 (m, 2H), 6.46 (d,  $J = 7.48$  Hz, 1H), 5.24 (d,  $J = 8.80$  Hz, 1H), 4.91 (d,  $J = 16.40$  Hz, 1H), 4.62 (d,  $J = 16.36$  Hz, 1H), 4.32 (d,  $J = 8.80$  Hz, 1H), 3.84 (s, 3H), 2.28 (s, 3H);  $^{13}\text{C}$  NMR (100.6 MHz,  $\text{CDCl}_3$ , 25 °C):  $\delta$  159.5, 143.8, 141.7, 137.5, 137.1, 135.7, 134.9, 133.9, 130.3, 130.0, 129.6, 129.2, 127.9, 127.8, 127.5, 126.9, 126.1, 124.8, 124.3, 123.8, 117.8, 114.5, 92.8, 74.9, 65.3, 55.8, 55.5, 21.7; HRMS (EI, TOF): calcd for  $\text{C}_{38}\text{H}_{31}\text{NO}_4\text{S}^+$   $[\text{M}]^+$ : 597.1974, found: 597.1973.

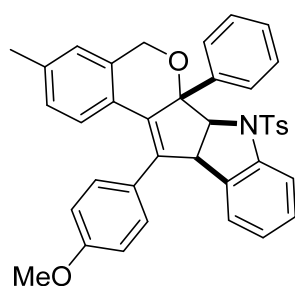

12-(4-Methoxyphenyl)-3-methyl-6a-phenyl-7-tosyl-6a,6b,7,11b-tetrahydro-5H-isochromeno[4',3':4,5]cyclopenta[1,2-b]indole (**3b**). The compound was prepared from (2-((4-methoxyphenyl)ethynyl)-5-methylphenyl)methanol and N-(2-(1-hydroxy-3-phenylprop-2-yn-1-yl)phenyl)-4-methylbenzenesulfonamide following the general procedure. The product **3b** was obtained in 56% yield as a white solid after column

chromatography (eluent = petroleum ether/ethyl acetate 10:1 v/v); Mp: 192-195 °C; <sup>1</sup>H NMR (400 MHz, d<sup>6</sup>-DMSO, 25 °C): δ 7.45-7.49 (m, 5H), 7.24 (d, *J* = 8.16 Hz, 2H), 7.17-7.20 (m, 2H), 7.07-7.12 (m, 4H), 6.90-6.95 (m, 2H), 6.83 (t, *J* = 7.44 Hz, 1H), 6.78 (d, *J* = 8.08 Hz, 1H), 6.73-6.74 (m, 2H), 6.47 (d, *J* = 7.48 Hz, 1H), 5.23 (d, *J* = 8.80 Hz, 1H), 4.86 (d, *J* = 16.40 Hz, 1H), 4.57 (d, *J* = 16.24 Hz, 1H), 4.28 (d, *J* = 8.84 Hz, 1H), 3.83 (s, 3H), 2.28 (s, 3H), 2.10 (s, 3H); <sup>13</sup>C NMR (100.6 MHz, CDCl<sub>3</sub>, 25 °C): δ 159.4, 143.7, 141.7, 137.7, 137.2, 136.4, 135.7, 134.7, 133.9, 132.8, 130.3, 130.1, 129.6, 127.8, 127.4, 127.1, 126.9, 126.4, 125.9, 124.8, 124.7, 123.7, 117.7, 114.4, 92.8, 74.9, 65.2, 55.7, 55.5, 21.6, 21.3; HRMS (EI, TOF): calcd for C<sub>39</sub>H<sub>33</sub>NO<sub>4</sub>S<sup>+</sup> [M]<sup>+</sup>: 611.2130, found: 611.2131.

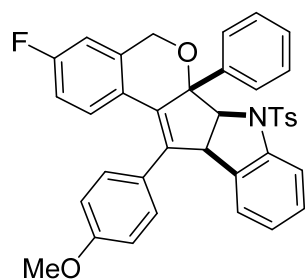

3-Fluoro-12-(4-methoxyphenyl)-6a-phenyl-7-tosyl-6a,6b,7,11b-tetrahydro-5H-isochromeno[4,3':4,5]cyclopenta[1,2-b]indole (**3c**). The compound was prepared from (5-fluoro-2-((4-methoxyphenyl)ethynyl)phenyl)methanol and N-(2-(1-hydroxy-3-phenylprop-2-yn-1-yl)phenyl)-4-methylbenzenesulfonamide following the general procedure. The product 3c was obtained in 68% yield as a white solid after column chromatography (eluent = petroleum ether/ethyl acetate 10:1 v/v); Mp: 191-193 °C; <sup>1</sup>H NMR (400 MHz, d<sup>6</sup>-DMSO, 25 °C): δ 7.47-7.49 (m, 5H), 7.31-7.35 (m, 1H), 7.24-7.26 (m, 3H), 7.09-7.13 (m, 4H), 6.91-6.96 (m, 1H), 6.78-6.85 (m, 5H), 6.45 (d, *J* = 7.52 Hz, 1H), 5.26 (d, *J* = 8.80 Hz, 1H), 4.93 (d, *J* = 16.84 Hz, 1H), 4.59 (d, *J* = 16.72 Hz, 1H), 4.32 (d, *J* = 8.76 Hz, 1H), 3.84 (s, 3H), 2.28 (s, 3H); <sup>13</sup>C NMR (100.6 MHz, CDCl<sub>3</sub>, 25 °C): δ 162.0 (d, *J* = 247.2 Hz), 159.6, 143.8, 141.7, 137.3, 137.1 (d, *J* = 5.1 Hz), 136.8, 135.7, 133.7, 131.9, 130.2, 129.8, 129.7, 128.1 (d, *J* = 7.9 Hz), 127.9, 127.7, 126.9, 125.4, 124.8, 123.7, 117.8, 114.6, 113.6 (d, *J* = 21.5 Hz), 110.9 (d, *J* = 21.8 Hz), 92.9, 74.8, 65.1, 55.8, 55.5, 21.6; <sup>19</sup>F NMR (376 MHz, CDCl<sub>3</sub>, 25 °C): δ 112.7; HRMS (EI, TOF): calcd for C<sub>38</sub>H<sub>30</sub>FNO<sub>4</sub>S<sup>+</sup> [M]<sup>+</sup>: 615.1880, found: 615.1876.



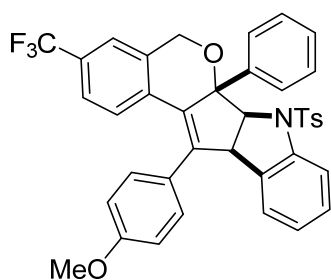

12-(4-Methoxyphenyl)-6a-phenyl-7-tosyl-3-(trifluoromethyl)-6a,6b,7,11b-tetrahydro-5H-isochromeno[4',3':4,5]cyclopenta[1,2-b]indole (**3d**). The compound was prepared from (2-((4-methoxyphenyl)ethynyl)-5-(trifluoromethyl)phenyl)methanol and N-(2-(1-hydroxy-3-phenylprop-2-yn-1-yl)phenyl)-4-methylbenzenesulfonamide following the general procedure. The product **3d** was obtained in 41% yield as a white solid after column chromatography (eluent = petroleum ether/ethyl acetate 10:1 v/v); Mp: 212-215 °C; <sup>1</sup>H NMR (400 MHz, d<sup>6</sup>-DMSO, 25 °C): δ 7.48-7.53 (m, 5H), 7.31-7.37 (m, 4H), 7.21-7.26 (m, 3H), 7.11-7.16 (m, 4H), 6.93-6.97 (m, 1H), 6.81-6.86 (m, 2H), 6.47 (d, *J* = 7.48 Hz, 1H), 5.30 (d, *J* = 8.80 Hz, 1H), 5.05 (d, *J* = 16.92 Hz, 1H), 4.65 (d, *J* = 16.88 Hz, 1H), 4.38 (d, *J* = 8.84 Hz, 1H), 3.85 (s, 3H), 2.28 (s, 3H); <sup>13</sup>C NMR (100.6 MHz, CDCl<sub>3</sub>, 25 °C): δ 159.8, 143.9, 141.7, 140.3, 136.7, 135.7, 135.4, 133.3, 132.6, 131.8, 130.1, 129.7, 129.5, 129.3, 128.9, 128.1, 127.8, 126.9, 125.1 (q, *J* = 273.2 Hz), 124.9, 122.9, 121.4, 117.8, 114.7, 92.8, 74.8, 65.0, 60.5, 55.9, 55.5, 21.6, 21.2; <sup>19</sup>F NMR (376 MHz, CDCl<sub>3</sub>, 25 °C): δ 62.9; HRMS (EI, TOF): calcd for C<sub>39</sub>H<sub>30</sub>F<sub>3</sub>NO<sub>4</sub>S<sup>+</sup> [M]<sup>+</sup>: 665.1848, found: 665.1843.

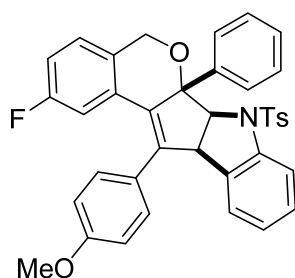

2-Fluoro-12-(4-methoxyphenyl)-6a-phenyl-7-tosyl-6a,6b,7,11b-tetrahydro-5H-isochromeno[4',3':4,5]cyclopenta[1,2-b]indole (**3e**). The compound was prepared from (4-fluoro-2-((4-methoxyphenyl)ethynyl)phenyl)methanol and N-(2-(1-hydroxy-3-phenylprop-2-yn-1-yl)phenyl)-4-methylbenzenesulfonamide following the general procedure. The product **3e** was obtained in 45% yield as a white solid after column

chromatography (eluent = petroleum ether/ethyl acetate 10:1 v/v); Mp: 198-200 °C; <sup>1</sup>H NMR (400 MHz, d<sup>6</sup>-DMSO, 25 °C): δ 7.48-7.52 (m, 5H), 7.24-7.26 (m, 3H), 7.10-7.16 (m, 4H), 6.98-7.03 (m, 3H), 6.92-6.96 (m, 2H), 6.79-6.85 (m, 2H), 6.42 (d, *J*=7.44 Hz, 1H), 5.26 (d, *J* = 8.80 Hz, 1H), 4.91 (d, *J* = 16.28 Hz, 1H), 4.57 (d, *J* = 16.20 Hz, 1H), 4.36 (d, *J* = 8.88 Hz, 1H), 3.85 (s, 3H), 2.28 (s, 3H); <sup>13</sup>C NMR (100.6 MHz, CDCl<sub>3</sub>, 25 °C): δ 160.8 (d, *J* = 241.8 Hz), 159.8, 143.8, 141.6, 139.0, 136.9, 135.7, 133.5, 131.9, 130.8, 130.7, 130.5, 130.1, 129.7, 129.2, 128.0, 127.7, 126.9, 125.9 (d, *J* = 8.3 Hz), 124.9, 123.7, 117.8, 115.1 (d, *J* = 21.9 Hz), 114.7, 112.4 (d, *J* = 22.9 Hz), 92.5, 74.7, 64.8, 55.9, 55.5, 21.6; <sup>19</sup>F NMR (376 MHz, CDCl<sub>3</sub>, 25 °C): δ 115.4; HRMS (EI, TOF): calcd for C<sub>38</sub>H<sub>30</sub>NO<sub>4</sub>S<sup>+</sup> [M]<sup>+</sup>: 615.1880, found: 615.1878.

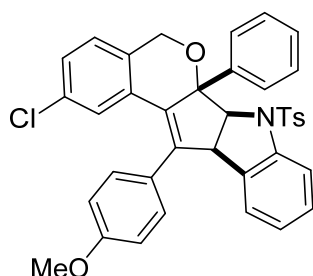

2-Chloro-12-(4-methoxyphenyl)-6a-phenyl-7-tosyl-6a,6b,7,11b-tetrahydro-5H-isochromeno[4',3':4,5]cyclopenta[1,2-b]indole (**3f**). The compound was prepared from (4-chloro-2-((4-methoxyphenyl)ethynyl)phenyl)methanol and N-(2-(1-hydroxy-3-phenylprop-2-yn-1-yl)phenyl)-4-methylbenzenesulfonamide following the general procedure. The product **3f** was obtained in 63% yield as a white solid after column chromatography (eluent = petroleum ether/ethyl acetate 10:1 v/v); Mp: 214-216 °C; <sup>1</sup>H NMR (400 MHz, d<sup>6</sup>-DMSO, 25 °C): δ 7.48-7.52 (m, 5H), 7.30 (d, *J* = 2.12 Hz, 1H), 7.24-7.26 (m, 3H), 7.10-7.16 (m, 5H), 6.92-7.00 (m, 3H), 6.79-6.85 (m, 2H), 6.43 (d, *J*=7.56 Hz, 1H), 5.26 (d, *J* = 8.80 Hz, 1H), 4.92 (d, *J* = 16.72 Hz, 1H), 4.57 (d, *J* = 16.60 Hz, 1H), 4.36 (d, *J* = 8.80 Hz, 1H), 3.85 (s, 3H), 2.28 (s, 3H); <sup>13</sup>C NMR (100.6 MHz, CDCl<sub>3</sub>, 25 °C): δ 159.8, 143.9, 141.6, 139.1, 136.8, 135.7, 133.5, 133.2, 131.8, 131.7, 130.8, 130.1, 129.7, 129.2, 128.0, 127.8, 127.7, 126.9, 125.9, 125.7, 124.9, 123.8, 117.8, 114.7, 92.6, 74.7, 64.9, 55.9, 55.5, 21.6; HRMS (EI, TOF): calcd for C<sub>38</sub>H<sub>30</sub>ClNO<sub>4</sub>S<sup>+</sup> [M]<sup>+</sup>: 631.1584, found: 631.1578.

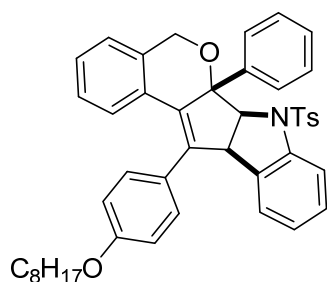

12-(4-(Octyloxy)phenyl)-6a-phenyl-7-tosyl-6a,6b,7,11b-tetrahydro-5H-isochromeno[4',3':4,5]cyclopenta[1,2-b]indole (**3g**). The compound was prepared from (2-((4-(octyloxy)phenyl)ethynyl)phenyl)methanol and N-(2-(1-hydroxy-3-phenylprop-2-yn-1-yl)phenyl)-4-methylbenzenesulfonamide following the general procedure. The product **3g** was obtained in 60% yield as a white solid after column chromatography (eluent = petroleum ether/ethyl acetate 10:1 v/v); Mp: 171-173 °C; <sup>1</sup>H NMR (400 MHz, d<sup>6</sup>-DMSO, 25 °C): δ 7.45-7.50 (m, 5H), 7.32 (d, *J* = 7.68 Hz, 1H), 7.23-7.26 (m, 3H), 7.06-7.11 (m, 5H), 6.92-6.94 (m, 4H), 6.78-6.84 (m, 2H), 6.45 (d, *J* = 7.92 Hz, 1H), 5.24 (d, *J* = 8.80 Hz, 1H), 4.91 (d, *J* = 16.40 Hz, 1H), 4.61 (d, *J* = 16.40 Hz, 1H), 4.31 (d, *J* = 8.72 Hz, 1H), 4.03 (t, *J* = 6.48 Hz, 2H), 2.28 (s, 3H), 1.72-1.79 (m, 2H), 1.42-1.48 (m, 2H), 1.23-1.32 (m, 8H), 0.85-0.89 (m, 3H); <sup>13</sup>C NMR (100.6 MHz, CDCl<sub>3</sub>, 25 °C): δ 159.2, 143.8, 141.7, 137.6, 137.2, 135.8, 134.8, 133.9, 132.7, 132.6, 130.3, 129.7, 129.6, 129.2, 129.1, 129.0, 127.9, 127.8, 127.7, 127.5, 126.9, 126.2, 126.1, 124.8, 124.3, 123.8, 117.8, 115.0, 92.8, 74.9, 68.3, 65.2, 65.1, 55.8, 31.9, 29.5, 29.4, 29.3, 26.2, 22.8, 21.6, 14.3; HRMS (EI, TOF): calcd for C<sub>45</sub>H<sub>45</sub>NO<sub>4</sub>S<sup>+</sup> [M]<sup>+</sup>: 695.3069, found: 695.3060.

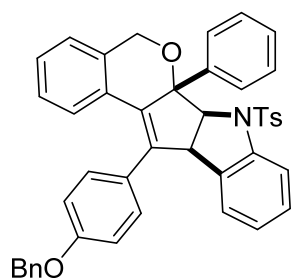

12-(4-(Benzyloxy)phenyl)-6a-phenyl-7-tosyl-6a,6b,7,11b-tetrahydro-5H-isochromeno[4',3':4,5]cyclopenta[1,2-b]indole (**3h**). The compound was prepared from (2-((4-(benzyloxy)phenyl)ethynyl)phenyl)methanol and N-(2-(1-hydroxy-3-phenylprop-2-yn-1-yl)phenyl)-4-methylbenzenesulfonamide following the

general procedure. The product 3h was obtained in 57% yield as a white solid after column chromatography (eluent = petroleum ether/ethyl acetate 10:1 v/v); Mp: 189-192 °C; <sup>1</sup>H NMR (400 MHz, d<sup>6</sup>-DMSO, 25 °C): δ 7.50-7.52 (m, 4H), 7.48 (d, *J* = 2.32 Hz, 2H), 7.41-7.46 (m, 3H), 7.30-7.38 (m, 4H), 7.24 (d, *J* = 8.24 Hz, 2H), 7.20 (d, *J* = 8.64 Hz, 2H), 7.06-7.12 (m, 3H), 6.93-6.96 (m, 3H), 6.79-6.85 (m, 2H), 6.45 (d, *J* = 7.44 Hz, 1H), 5.25 (d, *J* = 8.80 Hz, 1H), 5.19 (s, 2H), 4.91 (d, *J* = 16.40 Hz, 1H), 4.62 (d, *J* = 16.32 Hz, 1H), 4.32 (d, *J* = 8.72 Hz, 1H), 2.28 (s, 3H); <sup>13</sup>C NMR (100.6 MHz, CDCl<sub>3</sub>, 25 °C): δ 158.7, 143.8, 141.7, 137.4, 137.1, 136.8, 135.7, 134.8, 133.8, 132.8, 130.3, 130.2, 129.6, 129.1, 128.8, 128.3, 127.9, 127.8, 127.7, 127.5, 126.9, 126.1, 124.8, 124.3, 123.8, 117.8, 115.4, 92.7, 74.9, 70.3, 65.2, 55.7, 21.6; HRMS (EI, TOF): calcd for C<sub>44</sub>H<sub>35</sub>NO<sub>4</sub>S<sup>+</sup> [M]<sup>+</sup>: 673.2287, found: 673.2285.

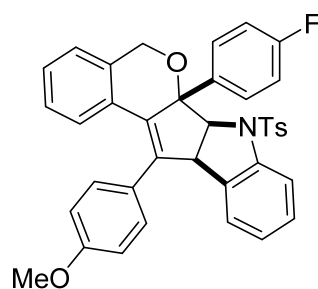

6a-(4-Fluorophenyl)-12-(4-methoxyphenyl)-7-tosyl-6a,6b,7,11b-tetrahydro-5H-isochromeno[4',3':4,5]cyclopenta[1,2-b]indole (**3i**). The compound was prepared from (2-((4-methoxyphenyl)ethynyl)phenyl)methanol and N-(2-(3-(4-fluorophenyl)-1-hydroxyprop-2-yn-1-yl)phenyl)-4-methylbenzenesulfonamide following the general procedure. The product 3i was obtained in 57% yield as a white solid after column chromatography (eluent = petroleum ether/ethyl acetate 10:1 v/v); Mp: 207-210 °C; <sup>1</sup>H NMR (400 MHz, d<sup>6</sup>-DMSO, 25 °C): δ 7.48-7.52 (m, 5H), 7.32 (d, *J* = 7.80 Hz, 1H), 7.24-7.26 (m, 3H), 7.08-7.13 (m, 4H), 6.93-6.99 (m, 4H), 6.83-6.88 (m, 2H), 6.46 (d, *J* = 7.48 Hz, 1H), 5.25 (d, *J* = 8.80 Hz, 1H), 4.92 (d, *J* = 16.44 Hz, 1H), 4.59 (d, *J* = 16.44 Hz, 1H), 4.33 (d, *J* = 8.80 Hz, 1H), 3.85 (s, 3H), 2.28 (s, 3H); <sup>13</sup>C NMR (100.6 MHz, CDCl<sub>3</sub>, 25 °C): δ 162.3 (d, *J* = 244.3 Hz), 159.6, 143.9, 141.6, 137.7, 135.6, 134.7, 133.8, 133.0, 132.9 (d, *J* = 2.9 Hz), 132.5, 130.2, 129.8, 129.7, 128.9, 128.1, 127.9, 126.9, 126.2 (d, *J* = 7.7 Hz), 124.9, 124.3, 123.8, 117.8, 114.5, 92.3, 74.8, 65.1, 55.7, 55.5, 21.6; <sup>19</sup>F NMR (376 MHz, CDCl<sub>3</sub>, 25 °C): δ 115.2; HRMS (EI, TOF): calcd for C<sub>38</sub>H<sub>30</sub>FNO<sub>4</sub>S<sup>+</sup> [M]<sup>+</sup>: 615.1880, found: 615.1882.

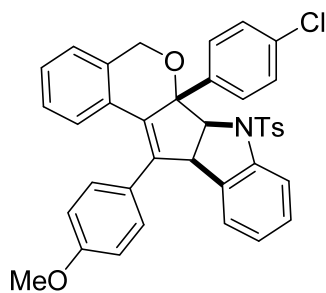

6a-(4-Chlorophenyl)-12-(4-methoxyphenyl)-7-tosyl-6a,6b,7,11b-tetrahydro-5H-isochromeno[4',3':4,5]cyclopenta[1,2-b]indole (**3j**). The compound was prepared from (2-((4-methoxyphenyl)ethynyl)phenyl)methanol and N-(2-(3-(4-chlorophenyl)-1-hydroxyprop-2-yn-1-yl)phenyl)-4-methylbenzenesulfonamide following the general procedure. The product **3j** was obtained in 60% yield as a white solid after column chromatography (eluent = petroleum ether/ethyl acetate 10:1 v/v); Mp: 207-209 °C; <sup>1</sup>H NMR (400 MHz, d<sup>6</sup>-DMSO, 25 °C): δ 7.47-7.52 (m, 5H), 7.24-7.32 (m, 4H), 7.08-7.13 (m, 4H), 6.93-7.01 (m, 4H), 6.83-6.88 (m, 2H), 6.46 (d, *J* = 7.44 Hz, 1H), 5.26 (d, *J* = 8.80 Hz, 1H), 4.93 (d, *J* = 16.52 Hz, 1H), 4.59 (d, *J* = 16.40 Hz, 1H), 4.35 (d, *J* = 8.80 Hz, 1H), 3.85 (s, 3H), 2.28 (s, 3H); <sup>13</sup>C NMR (100.6 MHz, CDCl<sub>3</sub>, 25 °C): δ 159.6, 143.9, 141.5, 137.9, 135.9, 135.6, 134.6, 133.7, 133.4, 132.4, 130.2, 129.7, 128.9, 128.2, 127.9, 126.9, 126.3, 126.2, 124.9, 124.3, 123.8, 117.9, 114.5, 92.4, 74.7, 65.2, 55.7, 55.5, 21.6; HRMS (EI, TOF): calcd for C<sub>38</sub>H<sub>30</sub>ClNO<sub>4</sub>S<sup>+</sup> [M]<sup>+</sup>: 631.1584, found: 631.1585.

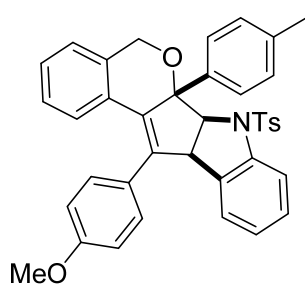

12-(4-Methoxyphenyl)-6a-(p-tolyl)-7-tosyl-6a,6b,7,11b-tetrahydro-5H-isochromeno[4',3':4,5]cyclopenta[1,2-b]indole (**3k**). The compound was prepared from (2-((4-methoxyphenyl)ethynyl)phenyl)methanol and N-(2-(1-hydroxy-3-(p-tolyl)prop-2-yn-1-yl)phenyl)-4-methylbenzenesulfonamide following the general procedure. The product **3k** was obtained in 53% yield as a white solid after column chromatography (eluent = petroleum ether/ethyl acetate 10:1 v/v); Mp: 211-213 °C;

$^1\text{H}$  NMR (400 MHz,  $d^6$ -DMSO, 25 °C):  $\delta$  7.45-7.49 (m, 5H), 7.23-7.29 (m, 4H), 7.05-7.12 (m, 4H), 6.90-6.95 (m, 4H), 6.82-6.85 (m, 2H), 6.45 (d,  $J = 7.76$  Hz, 1H), 5.22 (d,  $J = 8.80$  Hz, 1H), 4.88 (d,  $J = 16.40$  Hz, 1H), 4.59 (d,  $J = 16.44$  Hz, 1H), 4.31 (d,  $J = 9.04$  Hz, 1H), 3.84 (s, 3H), 2.28 (s, 3H), 2.16 (s, 3H);  $^{13}\text{C}$  NMR (100.6 MHz,  $\text{CDCl}_3$ , 25 °C):  $\delta$  159.5, 143.7, 141.7, 137.2, 136.9, 135.8, 134.9, 134.0, 133.9, 132.9, 130.3, 130.1, 129.6, 129.2, 127.8, 127.7, 126.9, 126.1, 126.0, 124.7, 124.3, 123.7, 117.9, 114.5, 92.7, 74.9, 65.2, 55.8, 55.5, 21.6, 21.2; HRMS (EI, TOF): calcd for  $\text{C}_{38}\text{H}_{30}\text{NO}_4\text{S}^+ [\text{M}]^+$ : 611.2130, found: 611.2132.

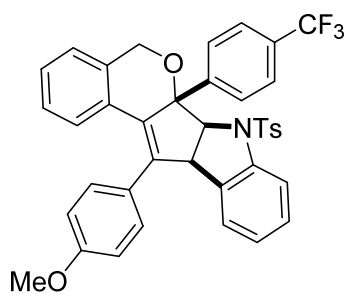

12-(4-Methoxyphenyl)-7-tosyl-6a-(4-(trifluoromethyl)phenyl)-6a,6b,7,11b-tetrahydro-5H-iso chromeno[4',3':4,5]cyclopenta[1,2-b]indole (**31**). The compound was prepared from (2-((4-methoxyphenyl)ethynyl)phenyl)methanol and N-(2-(1-hydroxy-3-(4-(trifluoromethyl)phenyl)prop-2-yn-1-yl)phenyl)-4-methylbenzenesulfonamide following the general procedure. The product **31** was obtained in 63% yield as a white solid after column chromatography (eluent = petroleum ether/ethyl acetate 10:1 v/v); Mp: 183-185 °C;  $^1\text{H}$  NMR (400 MHz,  $d^6$ -DMSO, 25 °C):  $\delta$  7.49-7.52 (m, 5H), 7.33 (d,  $J = 8.40$  Hz, 2H), 7.25 (d,  $J = 8.32$  Hz, 2H), 7.08-7.14 (m, 4H), 6.94-6.98 (m, 4H), 6.86 (t,  $J = 7.52$  Hz, 1H), 6.78 (d,  $J = 8.00$  Hz, 1H), 6.48 (d,  $J = 7.56$  Hz, 1H), 5.31 (d,  $J = 8.80$  Hz, 1H), 4.97 (d,  $J = 16.60$  Hz, 1H), 4.60 (d,  $J = 16.36$  Hz, 1H), 4.37 (d,  $J = 8.68$  Hz, 1H), 3.85 (s, 3H), 2.28 (s, 3H);  $^{13}\text{C}$  NMR (100.6 MHz,  $\text{CDCl}_3$ , 25 °C):  $\delta$  159.7, 143.9, 141.6, 141.4, 138.2, 135.5, 134.5, 133.7, 132.1, 130.2, 129.7, 129.6, 128.8, 128.2, 126.9, 126.6 (q,  $J = 278.4$  Hz), 126.4, 126.2, 124.3, 123.8, 117.9, 114.6, 92.4, 74.8, 65.3, 55.7, 55.5, 21.7;  $^{19}\text{F}$  NMR (376 MHz,  $\text{CDCl}_3$ , 25 °C):  $\delta$  65.2; HRMS (EI, TOF): calcd for  $\text{C}_{39}\text{H}_{30}\text{F}_3\text{NO}_4\text{S}^+ [\text{M}]^+$ : 665.1848, found: 665.1855.

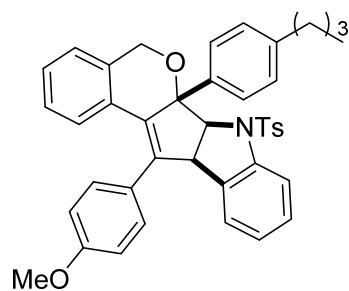

6a-(4-Ethylphenyl)-12-(4-methoxyphenyl)-7-tosyl-6a,6b,7,11b-tetrahydro-5H-isochromeno[4',3':4,5]cyclopenta[1,2-b]indole (**3m**). The compound was prepared from (2-((4-methoxyphenyl)ethynyl)phenyl)methanol and N-(2-(3-(4-butylphenyl)-1-hydroxyprop-2-yn-1-yl)phenyl)-4-methylbenzenesulfonamide following the general procedure. The product **3m** was obtained in 58% yield as a white solid after column chromatography (eluent = petroleum ether/ethyl acetate 10:1 v/v); Mp: 193-195 °C; <sup>1</sup>H NMR (400 MHz, d<sup>6</sup>-DMSO, 25 °C): δ 7.46-7.49 (m, 5H), 7.30 (d, *J* = 7.88 Hz, 1H), 7.22-7.24 (m, 3H), 7.05-7.13 (m, 4H), 6.84-6.94 (m, 4H), 6.83 (t, *J* = 7.32 Hz, 1H), 6.77 (d, *J* = 7.88 Hz, 1H), 6.46 (d, *J* = 7.40 Hz, 1H), 5.22 (d, *J* = 8.68 Hz, 1H), 4.88 (d, *J* = 16.36 Hz, 1H), 4.61 (d, *J* = 16.24 Hz, 1H), 4.37 (d, *J* = 8.72 Hz, 1H), 3.84 (s, 3H), 2.41-2.45 (m, 2H), 2.27 (s, 3H), 1.39-1.45 (m, 2H), 1.16-1.19 (m, 2H), 0.84 (t, *J* = 7.24 Hz, 3H); <sup>13</sup>C NMR (100.6 MHz, CDCl<sub>3</sub>, 25 °C): δ 159.5, 143.7, 142.0, 141.7, 137.1, 135.8, 134.9, 134.1, 132.8, 130.3, 130.2, 129.6, 129.2, 127.7, 126.9, 126.1, 124.8, 124.3, 123.6, 117.9, 114.5, 92.6, 74.9, 65.2, 55.6, 55.5, 35.3, 33.6, 22.2, 21.6, 14.1; HRMS (EI, TOF): calcd for C<sub>42</sub>H<sub>39</sub>NO<sub>4</sub>S<sup>+</sup> [*M*]<sup>+</sup>: 653.2600, found: 653.2599.

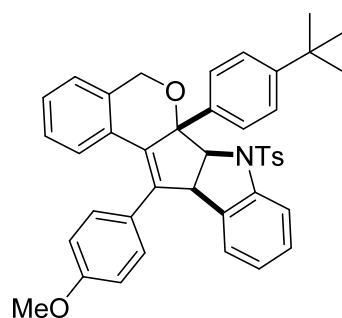

6a-(4-(*tert*-Butyl)phenyl)-12-(4-methoxyphenyl)-7-tosyl-6a,6b,7,11b-tetrahydro-5H-isochromeno[4',3':4,5]cyclopenta[1,2-b]indole (**3n**). The compound was prepared from (2-((4-methoxyphenyl)ethynyl)phenyl)methanol and N-(2-(3-(4-(*tert*-butyl)phenyl)-1-hydroxyprop-2-yn-1-yl)phenyl)-4-methylbenzenesulfonamid

e following the general procedure. The product 3n was obtained in 53% yield as a white solid after column chromatography (eluent = petroleum ether/ethyl acetate 10:1 v/v); Mp: 206-208 °C; <sup>1</sup>H NMR (400 MHz, d<sup>6</sup>-DMSO, 25 °C): δ 7.45-7.48 (m, 5H), 7.31 (d, *J* = 7.88 Hz, 1H), 7.22-7.24 (m, 3H), 7.06-7.13 (m, 4H), 6.93-6.96 (m, 2H), 6.87-6.91 (m, 2H), 6.81-6.85 (m, 1H), 6.70 (d, *J* = 7.24 Hz, 1H), 6.46 (d, *J* = 7.48 Hz, 1H), 5.19 (d, *J* = 8.56 Hz, 1H), 4.88 (d, *J* = 16.40 Hz, 1H), 4.63 (d, *J* = 16.24 Hz, 1H), 4.20 (d, *J* = 8.60 Hz, 1H), 3.85 (s, 3H), 2.28 (s, 3H), 1.16 (s, 9H); <sup>13</sup>C NMR (100.6 MHz, CDCl<sub>3</sub>, 25 °C): δ 159.5, 150.2, 143.7, 141.8, 137.0, 135.9, 135.0, 134.3, 133.8, 132.6, 130.3, 129.6, 129.2, 127.7, 127.6, 126.1, 126.0, 124.8, 124.4, 123.5, 118.0, 114.5, 92.4, 75.0, 65.2, 55.5, 34.5, 31.4, 21.6; HRMS (EI, TOF): calcd for C<sub>42</sub>H<sub>39</sub>NO<sub>4</sub>S<sup>+</sup> [M]<sup>+</sup>: 653.2600, found: 653.2595.

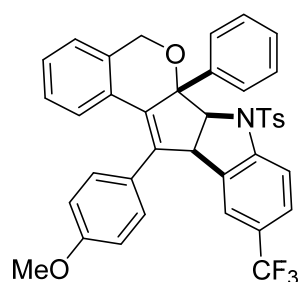

12-(4-Methoxyphenyl)-6a-phenyl-7-tosyl-10-(trifluoromethyl)-6a,6b,7,11b-tetrahydro-5H-iso chromeno[4',3':4,5]cyclopenta[1,2-b]indole (**3o**). The compound was prepared from (2-((4-methoxyphenyl)ethynyl)phenyl)methanol and N-(2-(1-hydroxy-3-phenylprop-2-yn-1-yl)-4-(trifluoromethyl)phenyl)-4-methylbenzenesulfonamide following the general procedure. The product 3o was obtained in 50% yield as a white solid after column chromatography (eluent = petroleum ether/ethyl acetate 10:1 v/v); Mp: 189-192 °C; <sup>1</sup>H NMR (400 MHz, d<sup>6</sup>-DMSO, 25 °C): δ 7.52-7.55 (m, 5H), 7.23-7.35 (m, 6H), 7.08-7.15 (m, 5H), 6.93-6.94 (m, 3H), 6.66 (d, *J* = 7.92 Hz, 1H), 5.35 (d, *J* = 8.80 Hz, 1H), 4.93 (d, *J* = 16.44 Hz, 1H), 4.64 (d, *J* = 16.36 Hz, 1H), 4.46 (d, *J* = 8.76 Hz, 1H), 3.85 (s, 3H), 2.28 (s, 3H); <sup>13</sup>C NMR (100.6 MHz, CDCl<sub>3</sub>, 25 °C): δ 159.7, 144.2, 142.2, 137.6, 136.8, 136.3, 135.5, 134.9, 133.3, 130.3, 129.9, 129.6, 128.1, 127.9, 127.5 (q, *J* = 287.2 Hz), 126.9, 126.3, 124.4, 124.1, 121.7, 114.7, 114.5, 92.8, 75.1, 65.3, 55.6, 55.5, 21.7; <sup>19</sup>F NMR (376 MHz, CDCl<sub>3</sub>, 25 °C): δ 62.4; HRMS (EI, TOF): calcd for C<sub>39</sub>H<sub>30</sub>F<sub>3</sub>NO<sub>4</sub>S<sup>+</sup> [M]<sup>+</sup>: 665.1848, found: 665.1847.



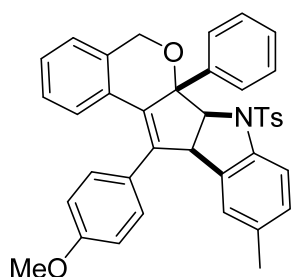

12-(4-Methoxyphenyl)-10-methyl-6a-phenyl-7-tosyl-6a,6b,7,11b-tetrahydro-5H-isochromeno[4',3':4,5]cyclopenta[1,2-b]indole (**3p**). The compound was prepared from (2-((4-methoxyphenyl)ethynyl)phenyl)methanol and N-(2-(1-hydroxy-3-phenylprop-2-yn-1-yl)-4-methylphenyl)-4-methylbenzenesulfonamide following the general procedure. The product **3p** was obtained in 67% yield as a white solid after column chromatography (eluent = petroleum ether/ethyl acetate 10:1 v/v); Mp: 196-198 °C; <sup>1</sup>H NMR (400 MHz, d<sup>6</sup>-DMSO, 25 °C): δ 7.46-7.48 (m, 5H), 7.24-7.29 (m, 4H), 7.09-7.12 (m, 4H), 7.05-7.07 (m, 2H), 6.91-6.94 (m, 2H), 6.75 (d, *J* = 8.88 Hz, 1H), 6.69 (d, *J* = 8.20 Hz, 1H), 6.29 (s, 1H), 5.21 (d, *J* = 8.72 Hz, 1H), 4.90 (d, *J* = 16.48 Hz, 1H), 4.60 (d, *J* = 16.48 Hz, 1H), 4.24 (d, *J* = 8.84 Hz, 1H), 3.85 (s, 3H), 2.28 (s, 3H), 2.05 (s, 3H); <sup>13</sup>C NMR (100.6 MHz, CDCl<sub>3</sub>, 25 °C): δ 159.5, 143.6, 139.3, 137.6, 137.1, 135.7, 134.9, 134.5, 133.9, 132.7, 130.3, 129.6, 129.2, 128.6, 127.7, 127.4, 127.0, 126.1, 126.0, 124.3, 124.2, 117.5, 114.4, 92.7, 75.0, 65.2, 55.7, 55.5, 21.6, 21.3; HRMS (EI, TOF): calcd for C<sub>39</sub>H<sub>33</sub>NO<sub>4</sub>S<sup>+</sup> [M]<sup>+</sup>: 611.2130, found: 611.2125.

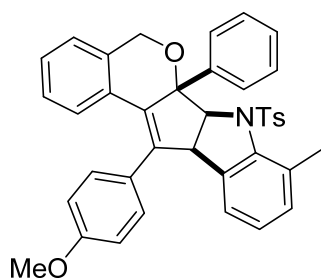

12-(4-Methoxyphenyl)-8-methyl-6a-phenyl-7-tosyl-6a,6b,7,11b-tetrahydro-5H-isochromeno[4',3':4,5]cyclopenta[1,2-b]indole (**3q**). The compound was prepared from (2-((4-methoxyphenyl)ethynyl)phenyl)methanol and N-(2-(1-hydroxy-3-phenylprop-2-yn-1-yl)-6-methylphenyl)-4-methylbenzenesulfonamide

following the general procedure. The product 3q was obtained in 40% yield as a white solid after column chromatography (eluent = petroleum ether/ethyl acetate 10:1 v/v); Mp: 215-217 °C; <sup>1</sup>H NMR (400 MHz, d<sup>6</sup>-DMSO, 25 °C): δ 7.25-7.33 (m, 8H), 7.18-7.20 (m, 1H), 7.07-7.13 (m, 4H), 7.04 (t, *J* = 7.48 Hz, 1H), 6.87-6.90 (m, 4H), 6.80 (d, *J* = 7.36 Hz, 1H), 6.39 (d, *J* = 7.48 Hz, 1H), 5.08 (d, *J* = 7.64 Hz, 1H), 4.86 (d, *J* = 16.60 Hz, 1H), 4.52 (d, *J* = 16.28 Hz, 1H), 3.83 (s, 3H), 3.56 (d, *J* = 7.68 Hz, 1H), 2.33 (s, 3H), 1.68 (s, 3H); <sup>13</sup>C NMR (100.6 MHz, CDCl<sub>3</sub>, 25 °C): δ 159.5, 143.9, 140.9, 138.3, 137.8, 137.2, 134.7, 134.5, 133.5, 132.8, 130.3, 130.1, 129.4, 129.1, 127.9, 127.7, 127.4, 126.2, 126.1, 126.0, 124.2, 120.8, 114.4, 91.7, 75.5, 65.0, 55.5, 55.3, 21.7, 19.3; HRMS (EI, TOF): calcd for C<sub>39</sub>H<sub>33</sub>NO<sub>4</sub>S<sup>+</sup> [M]<sup>+</sup>: 611.2130, found: 611.2132.

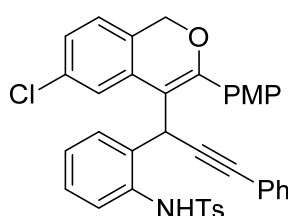

N-(2-(1-(6-chloro-3-(4-methoxyphenyl)-1H-isochromen-4-yl)-3-phenylprop-2-yn-1-yl)phenyl)-4-methylbenzenesulfonamide (**4**). <sup>1</sup>H NMR (400 MHz, CDCl<sub>3</sub>, 25 °C): δ 7.75-7.78 (m, 3H), 7.50 (d, *J* = 1.92 Hz, 1H), 7.43-7.47 (m, 3H), 7.29-7.31 (m, 3H), 7.10-7.13 (m, 1H), 7.04-7.08 (m, 2H), 7.01-7.04 (m, 1H), 6.98 (d, *J* = 8.24 Hz, 2H), 6.86-6.95 (m, 5H), 5.14 (d, *J* = 12.52 Hz, 1H), 4.96 (d, *J* = 12.44 Hz, 1H), 4.74 (s, 1H), 3.86 (s, 3H), 2.23 (s, 3H); <sup>13</sup>C NMR (100.6 MHz, CDCl<sub>3</sub>, 25 °C): δ 161.6, 155.4, 143.5, 136.1, 135.1, 133.5, 132.3, 132.1, 131.7, 129.6, 129.4, 128.9, 128.7, 128.5, 128.4, 127.7, 126.7, 126.4, 125.3, 125.1, 125.0, 123.7, 122.7, 122.6, 114.1, 109.4, 87.9, 87.1, 69.0, 55.6, 34.9, 21.5; HRMS (EI, TOF): calcd for C<sub>38</sub>H<sub>30</sub>ClNO<sub>4</sub>S<sup>+</sup> [M]<sup>+</sup>: 631.1584, found: 631.1574.

## 5. Copies of the $^1\text{H}$ NMR, $^{13}\text{C}$ NMR and $^{19}\text{F}$ NMR spectra of products.

$^1\text{H}$  NMR of product **3a**.

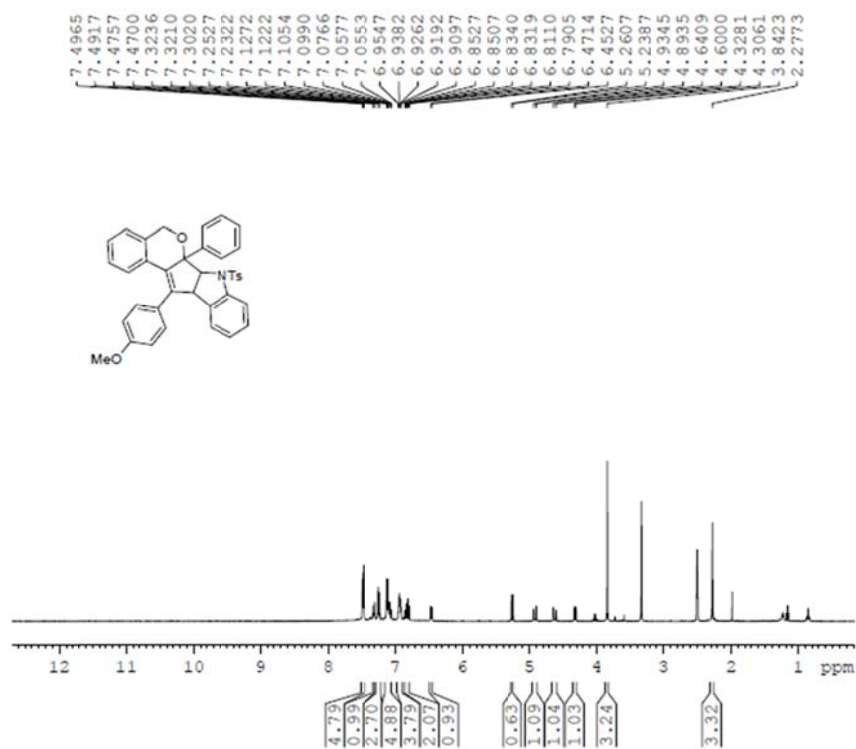

$^{13}\text{C}$  NMR of product **3a**.

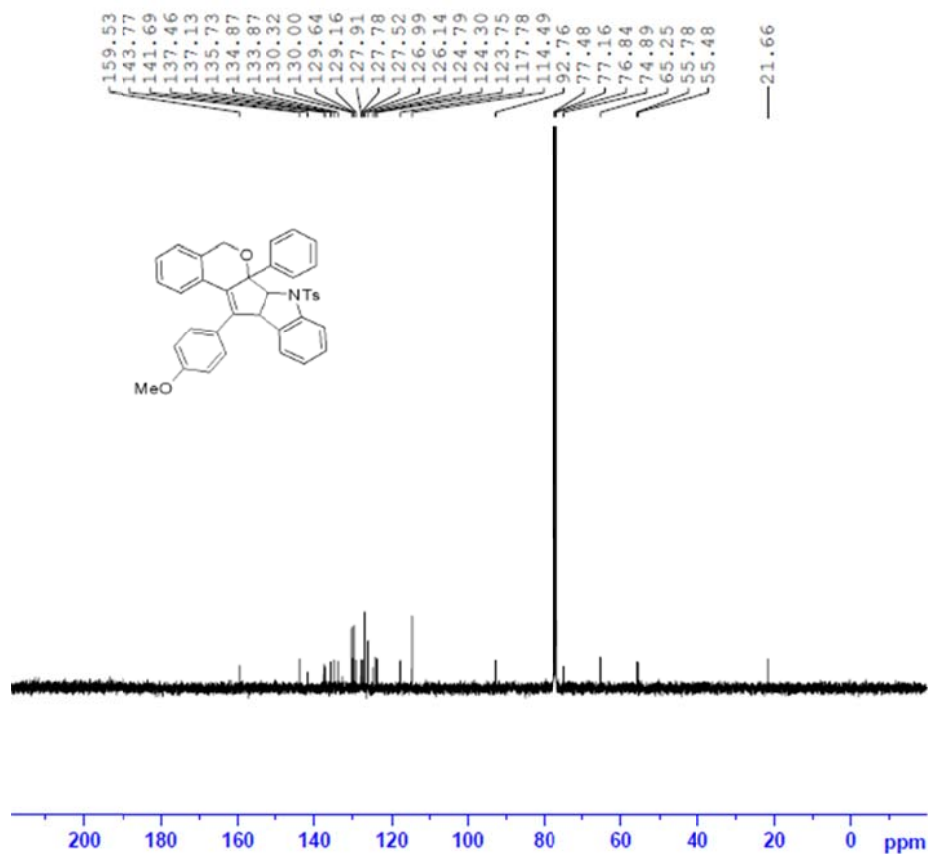

<sup>1</sup>H NMR of product **3b**.

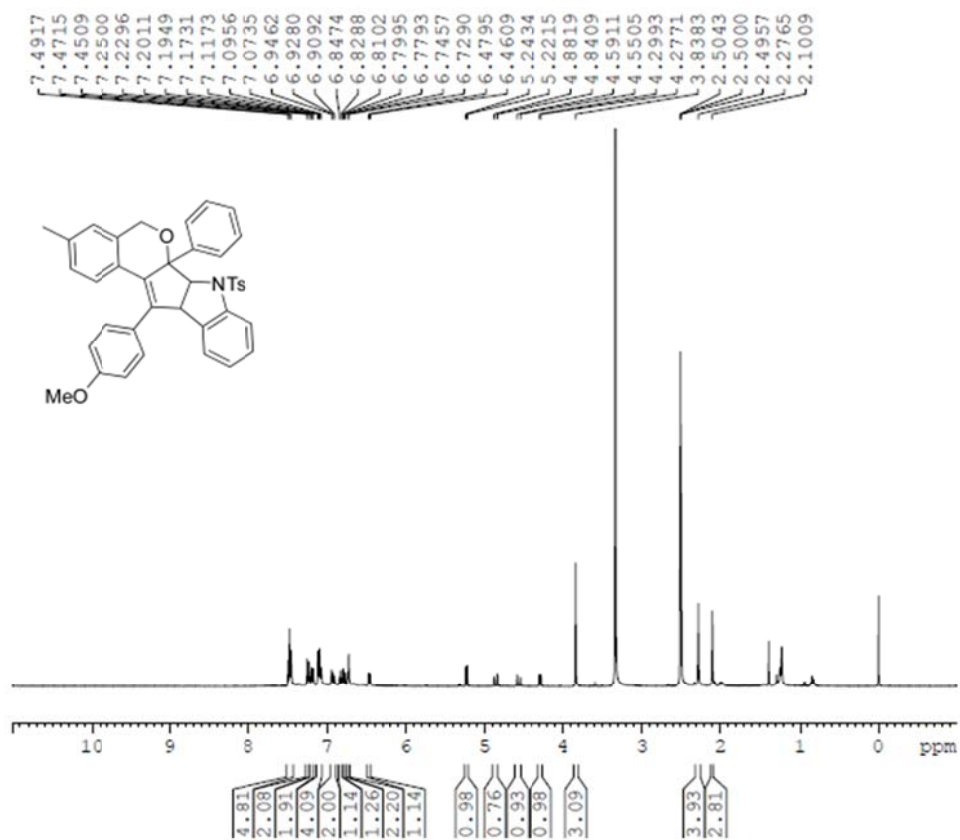

<sup>13</sup>C NMR of product **3b**.

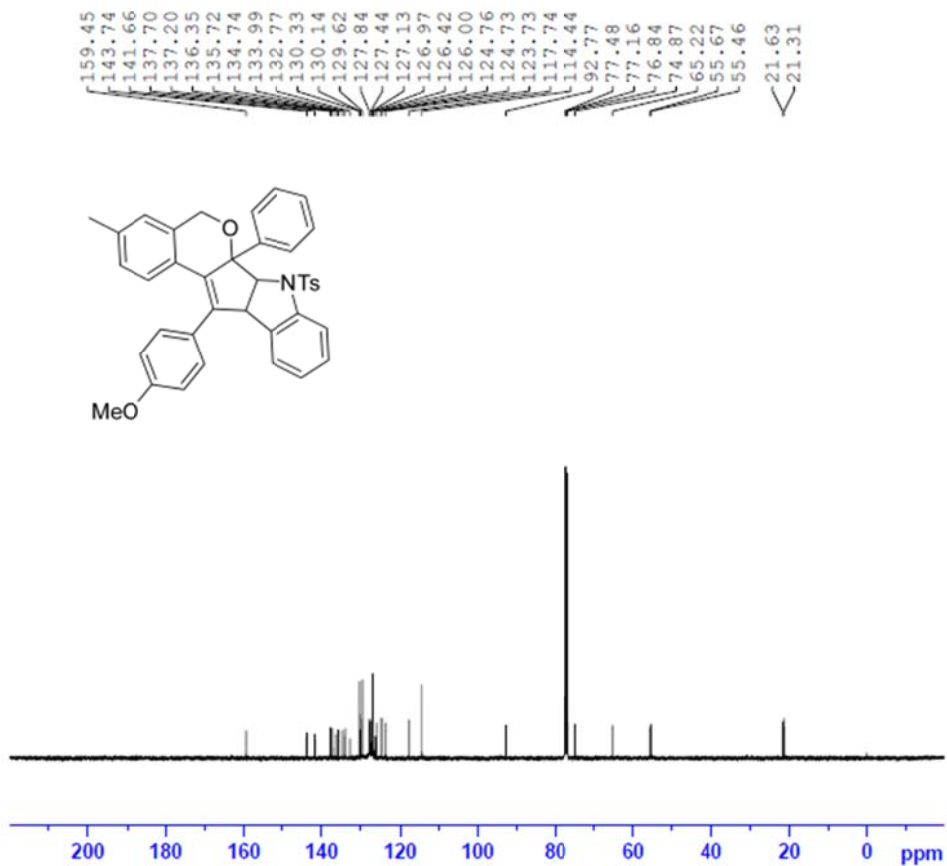

<sup>1</sup>H NMR of product **3c**

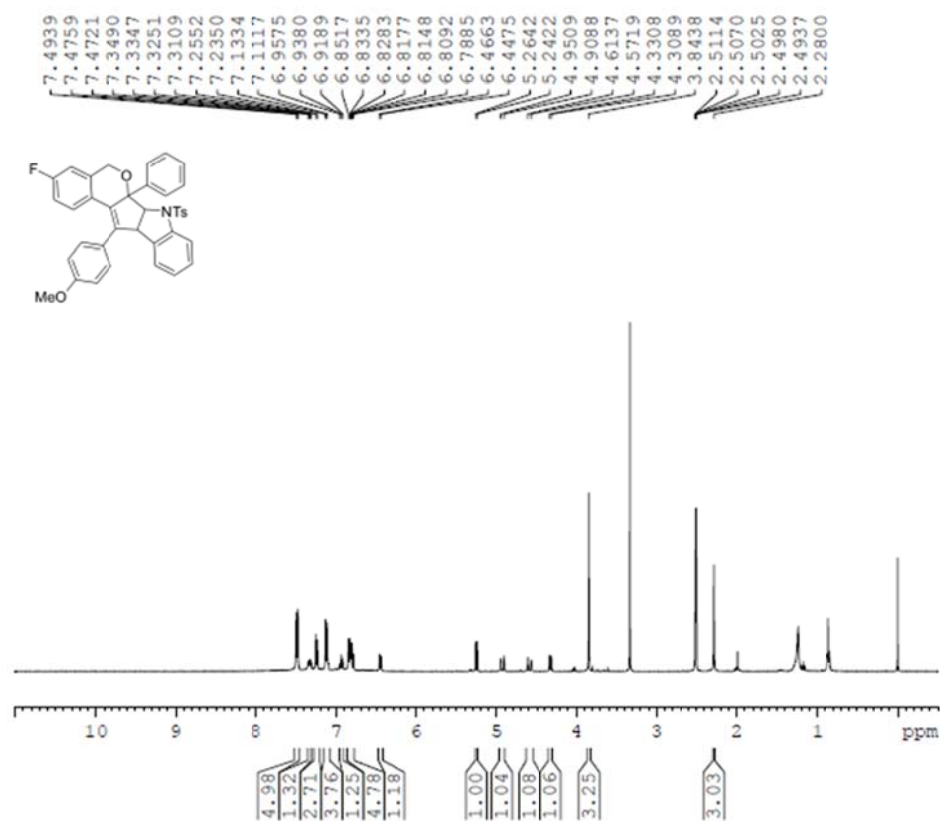

<sup>13</sup>C NMR of product **3c**

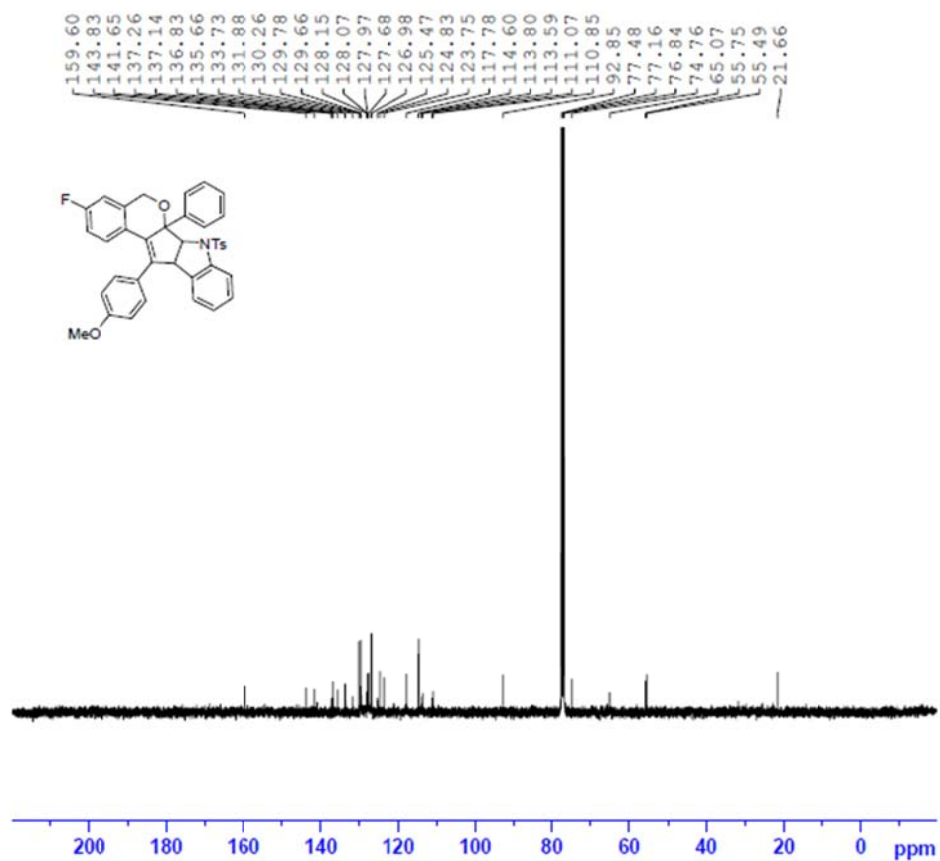

$^{19}\text{F}$  NMR of product **3c**

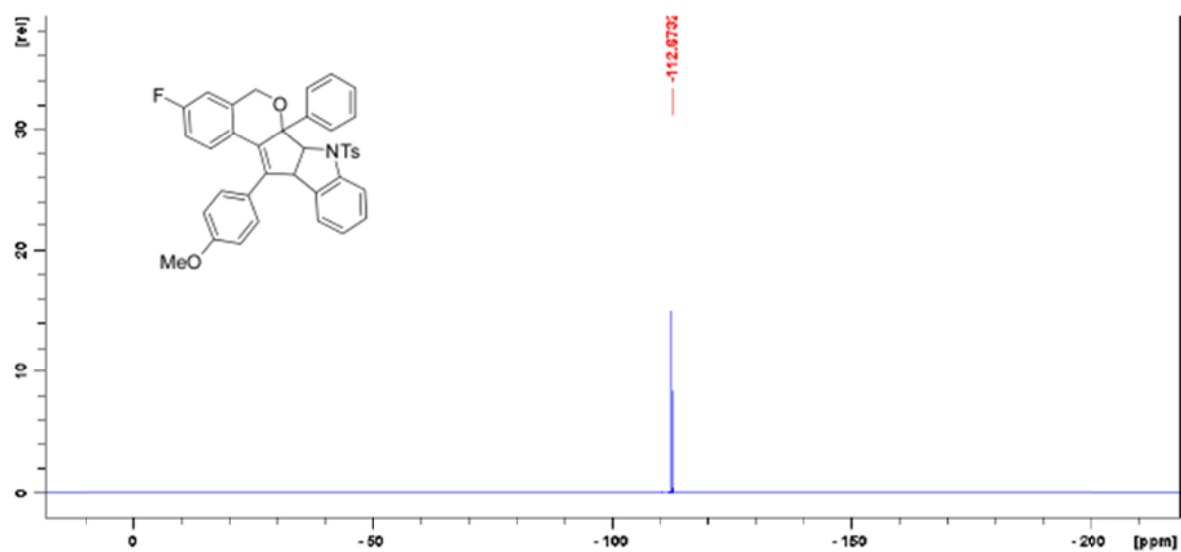

$^1\text{H}$  NMR of product **3d**

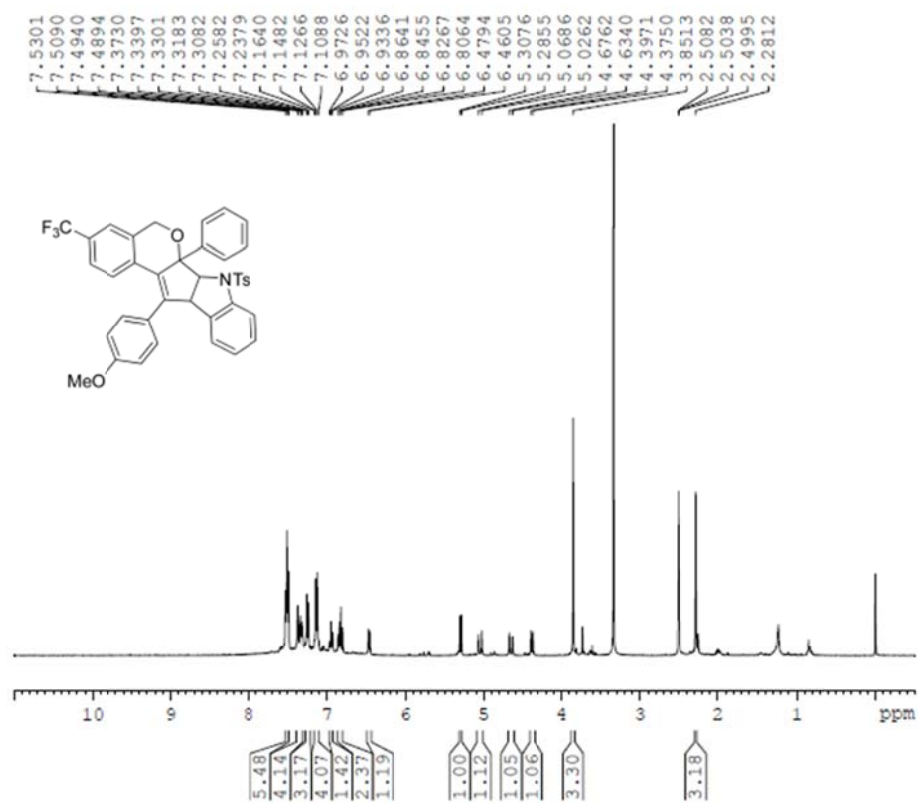

$^{13}\text{C}$  NMR of product **3d**

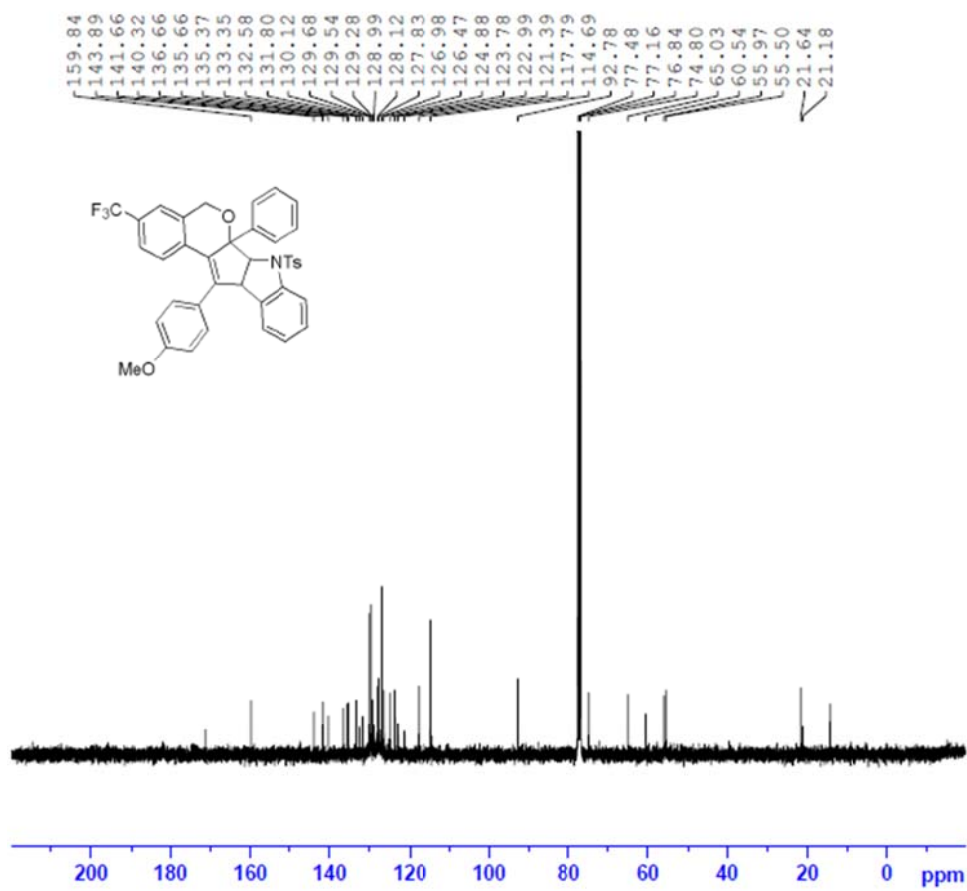

$^{19}\text{F}$  NMR of product **3d**

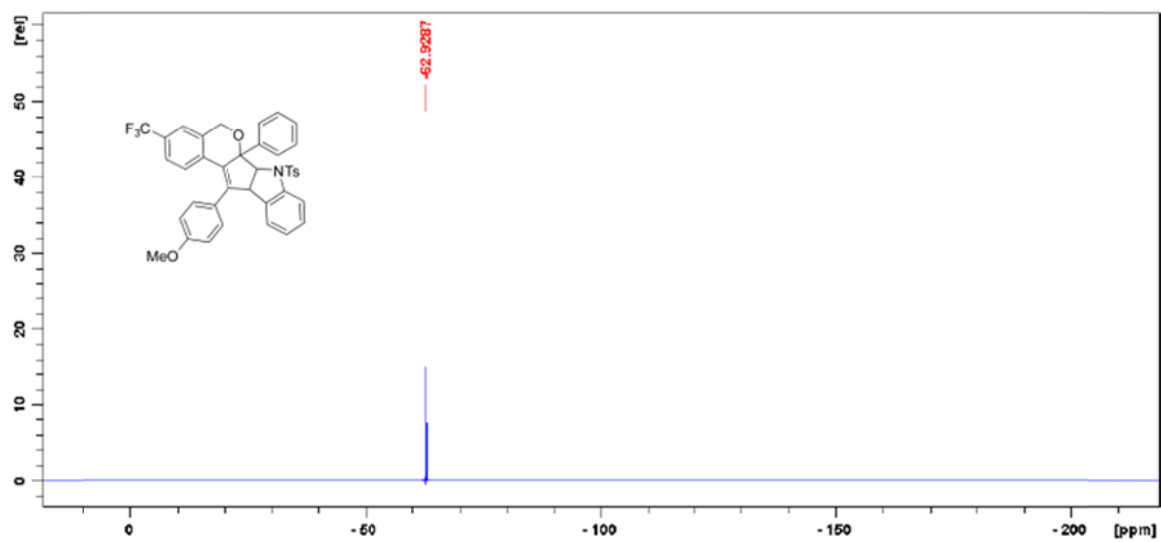

<sup>1</sup>H NMR of product **3e**

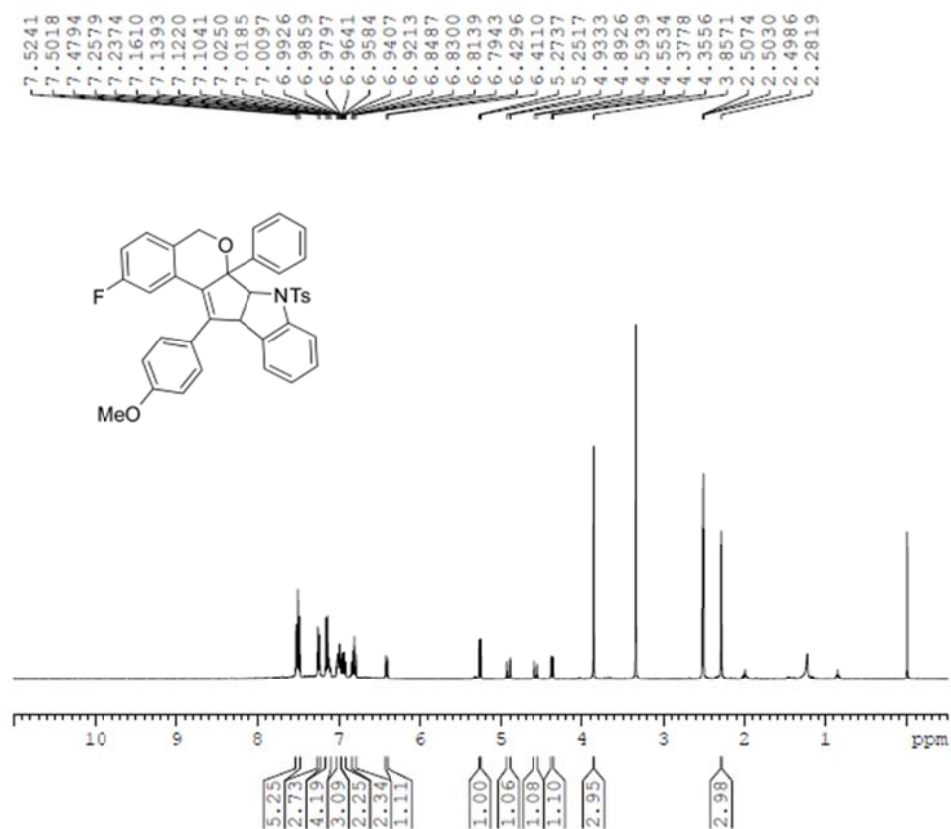

<sup>13</sup>C NMR of product **3e**

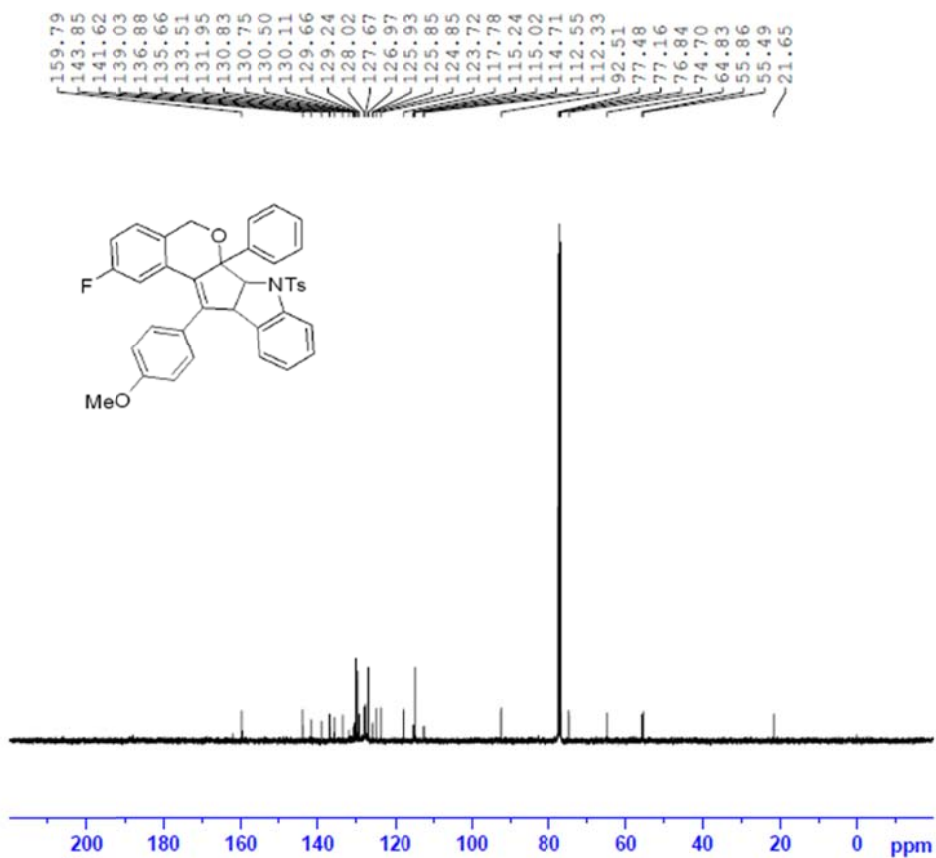



$^{19}\text{F}$  NMR of product **3e**

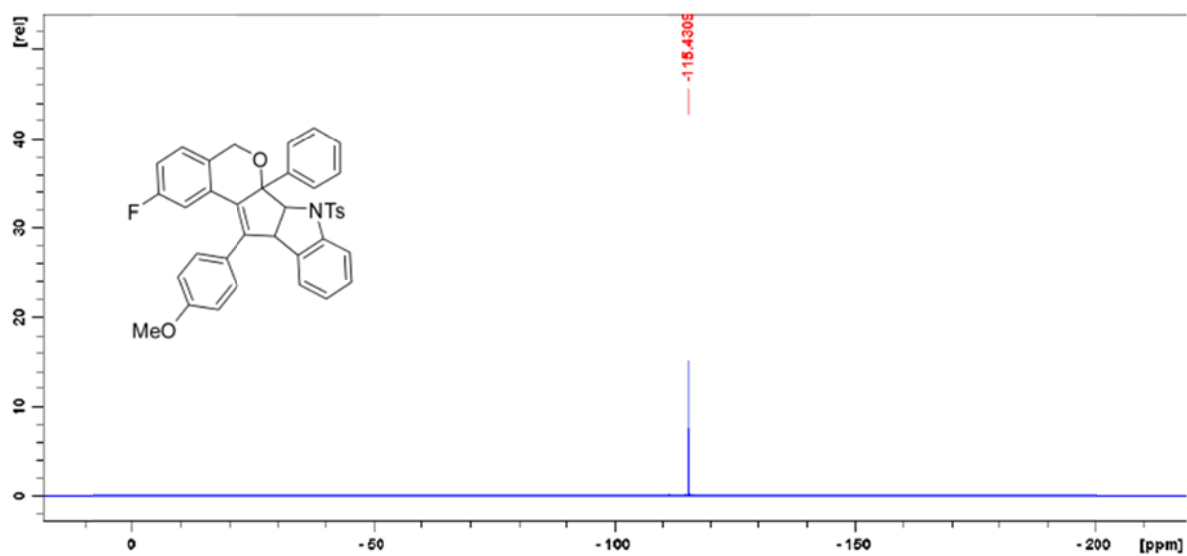

$^1\text{H}$  NMR of product **3f**

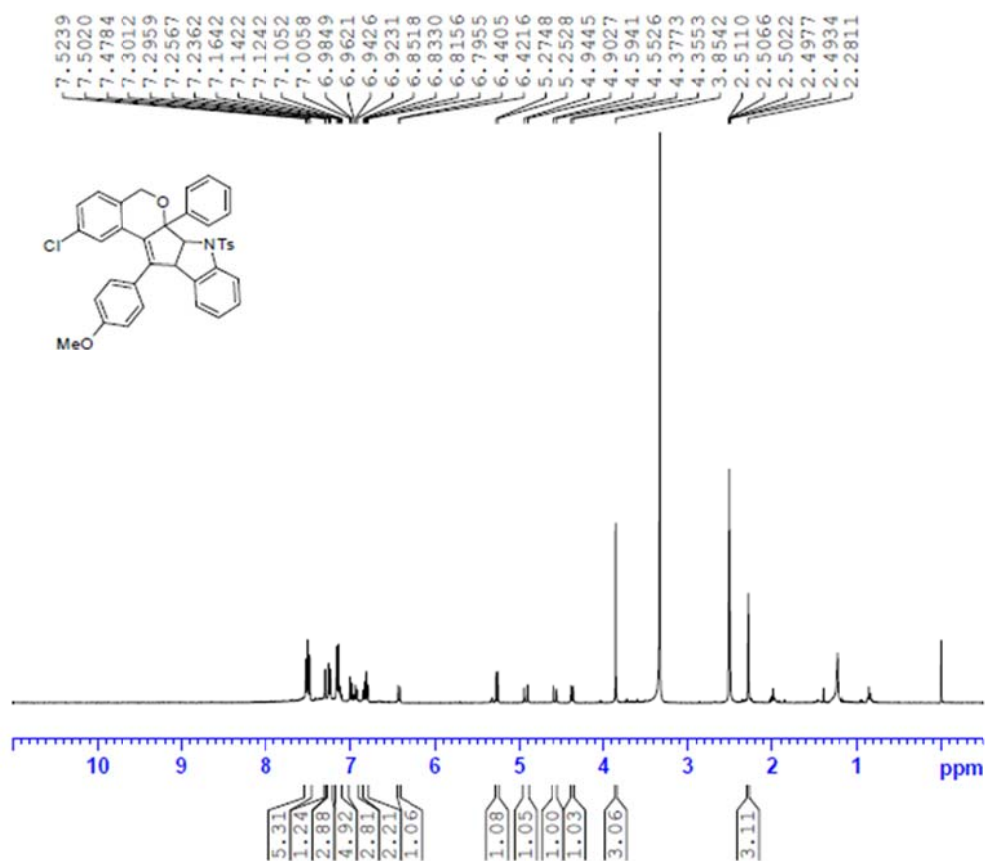

$^{13}\text{C}$  NMR of product **3f**

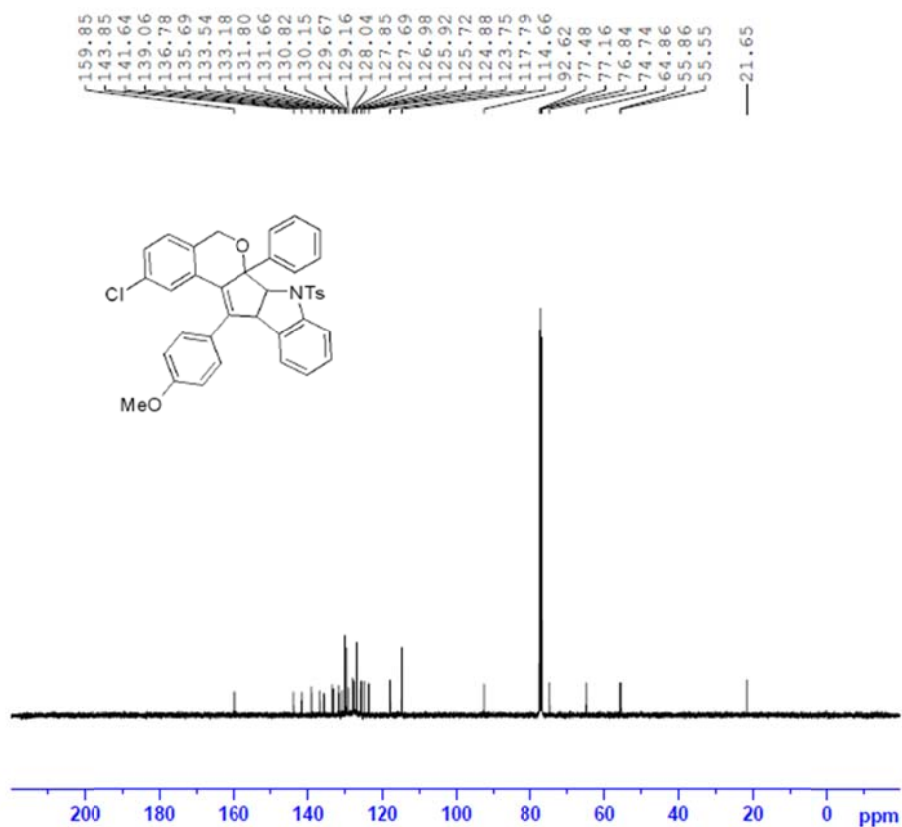

$^1\text{H}$  NMR of product **3g**

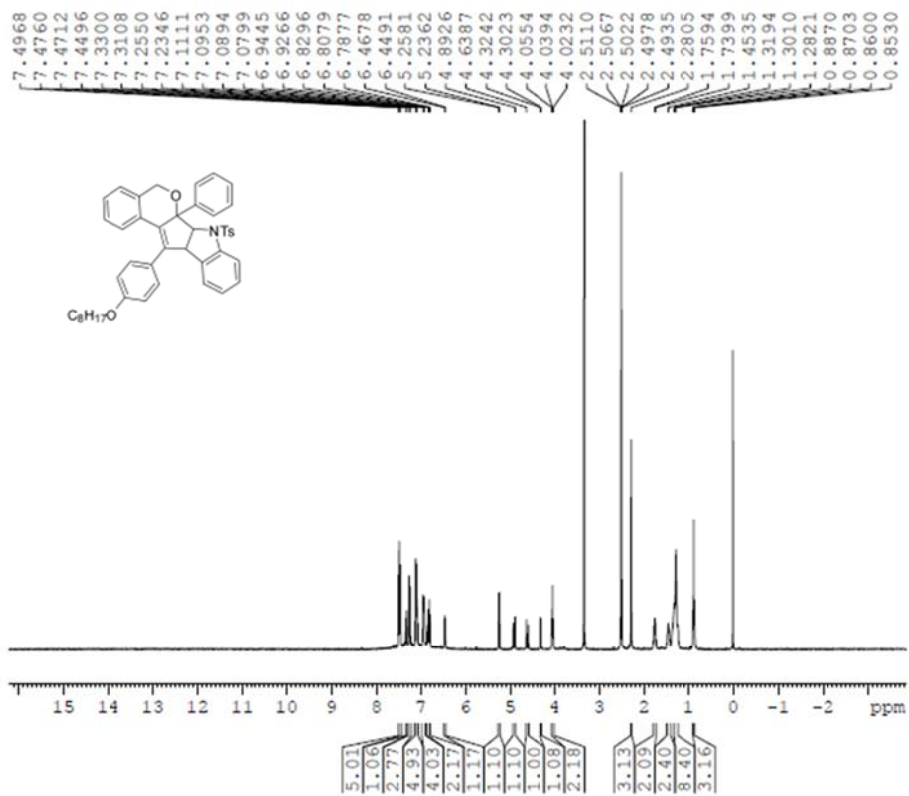

$^{13}\text{C}$  NMR of product **3g**

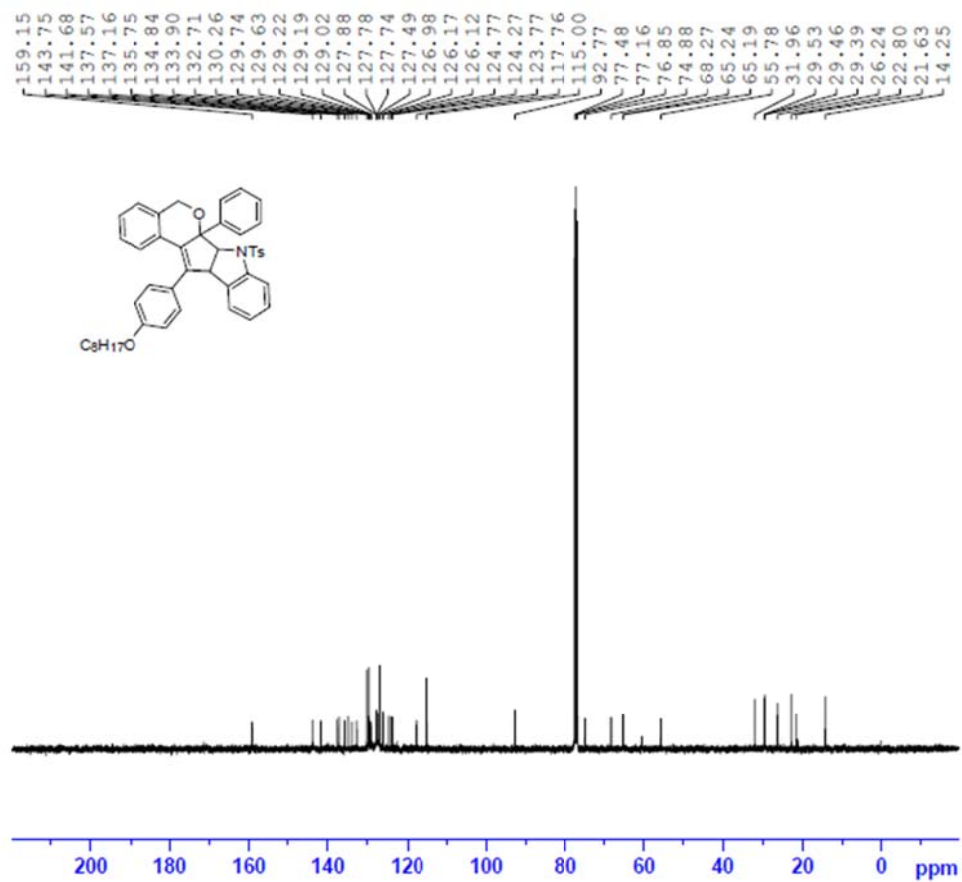

$^1\text{H}$  NMR of product **3h**

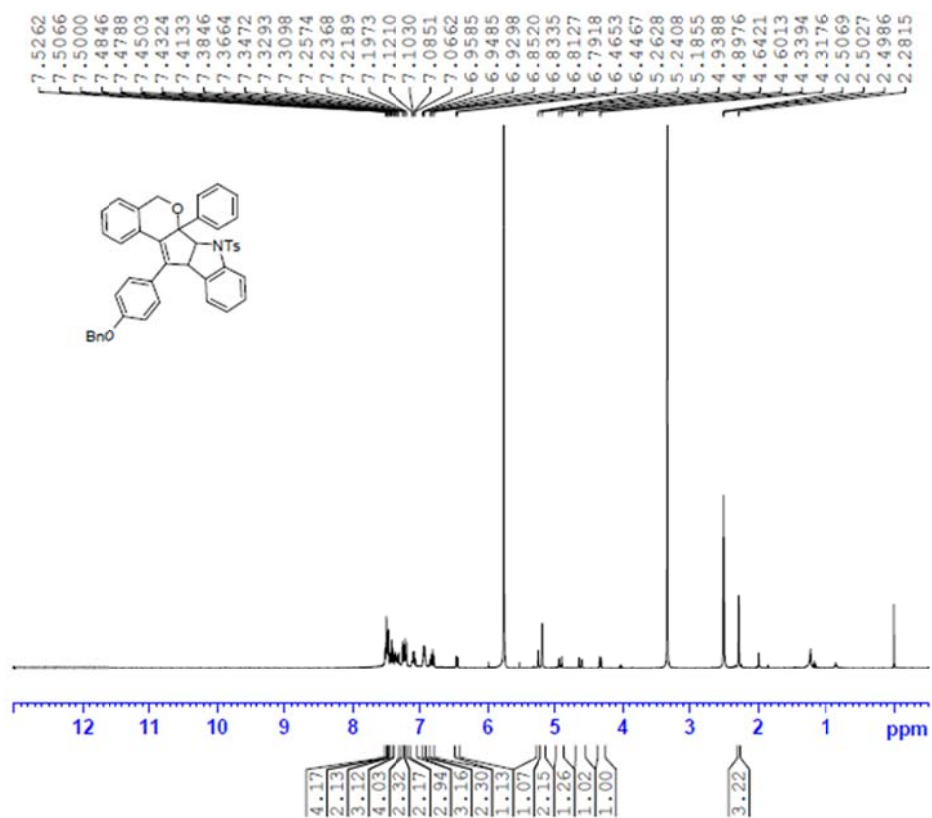

$^{13}\text{C}$  NMR of product **3h**

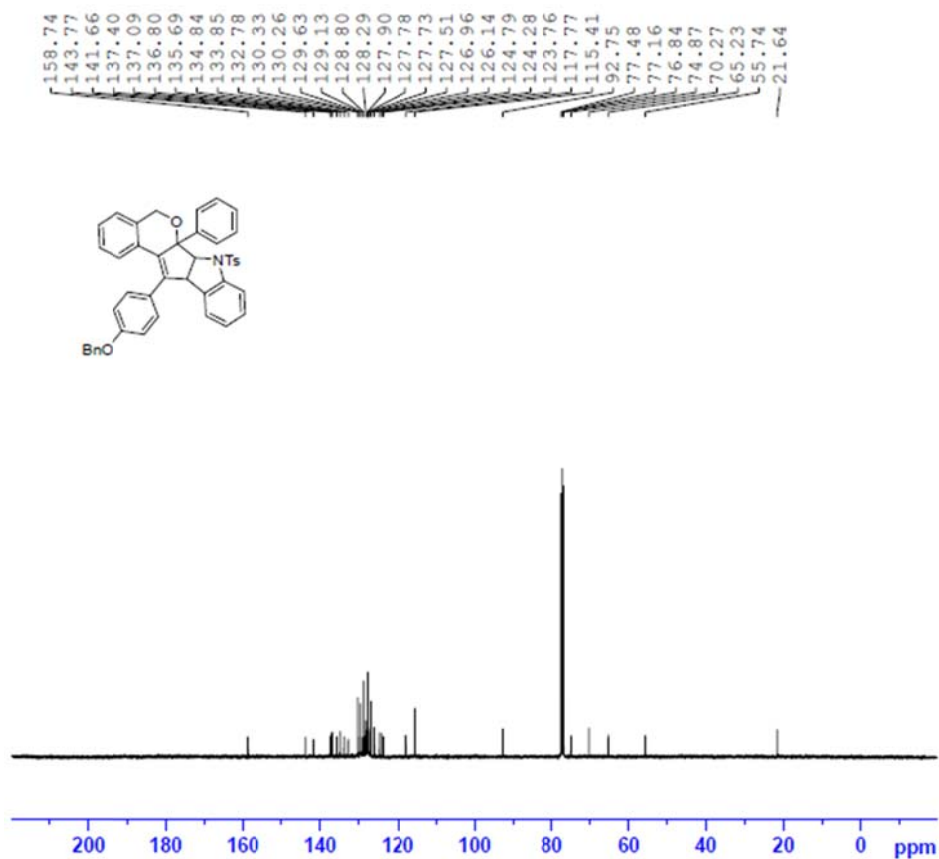

$^1\text{H}$  NMR of product **3i**

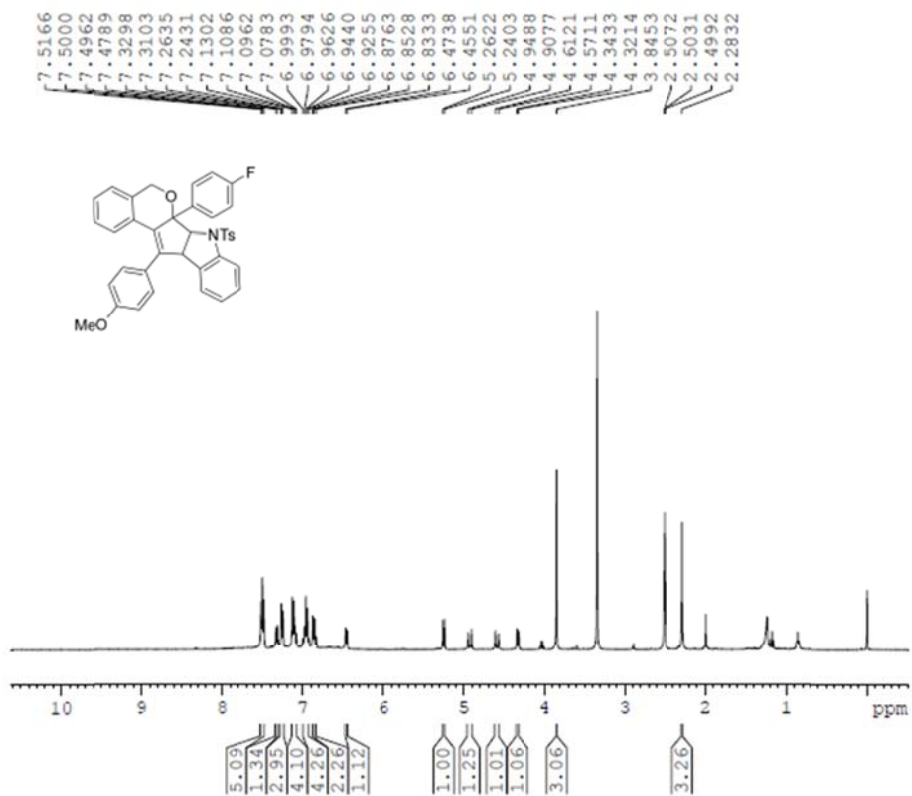

$^{13}\text{C}$  NMR of product **3i**

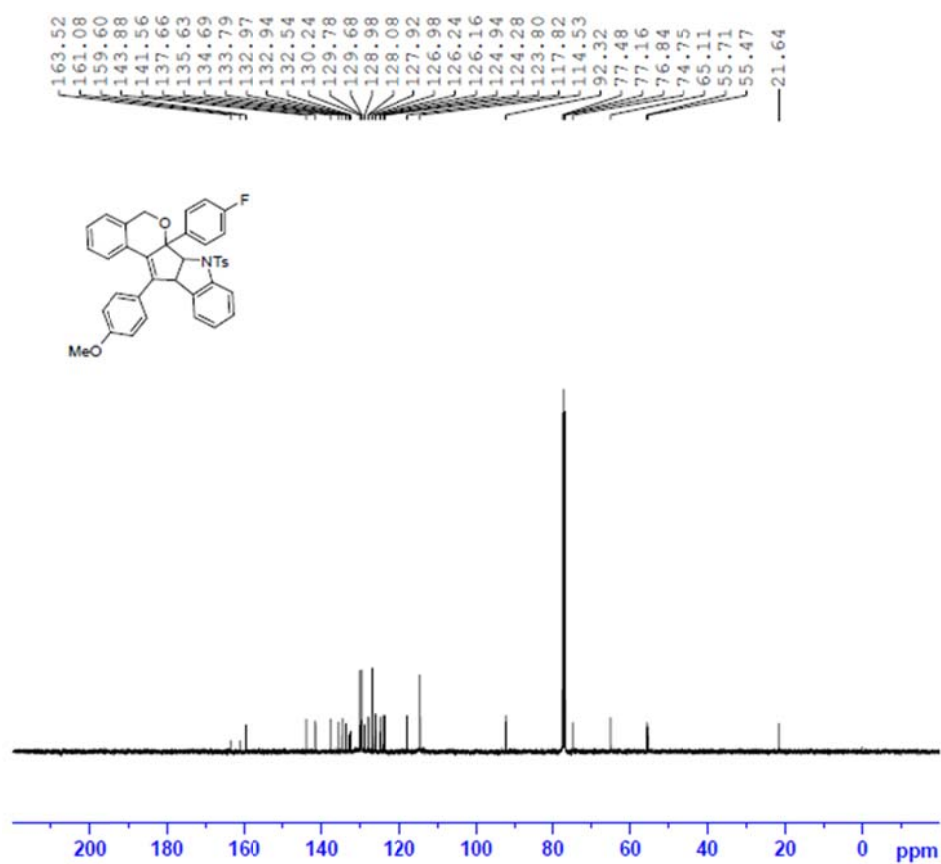

$^{19}\text{F}$  NMR of product **3i**

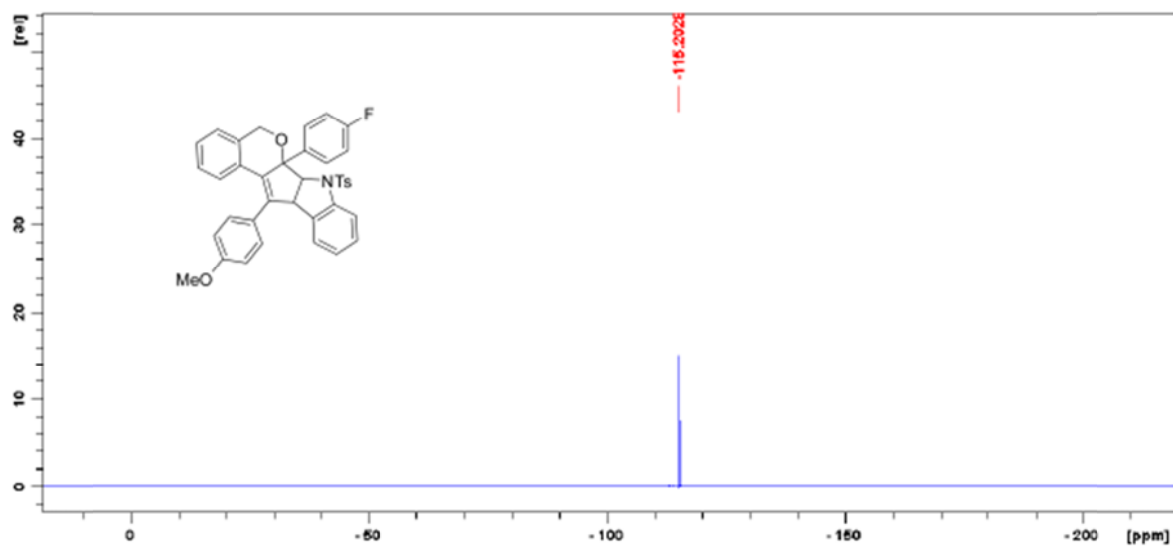

<sup>1</sup>H NMR of product **3j**

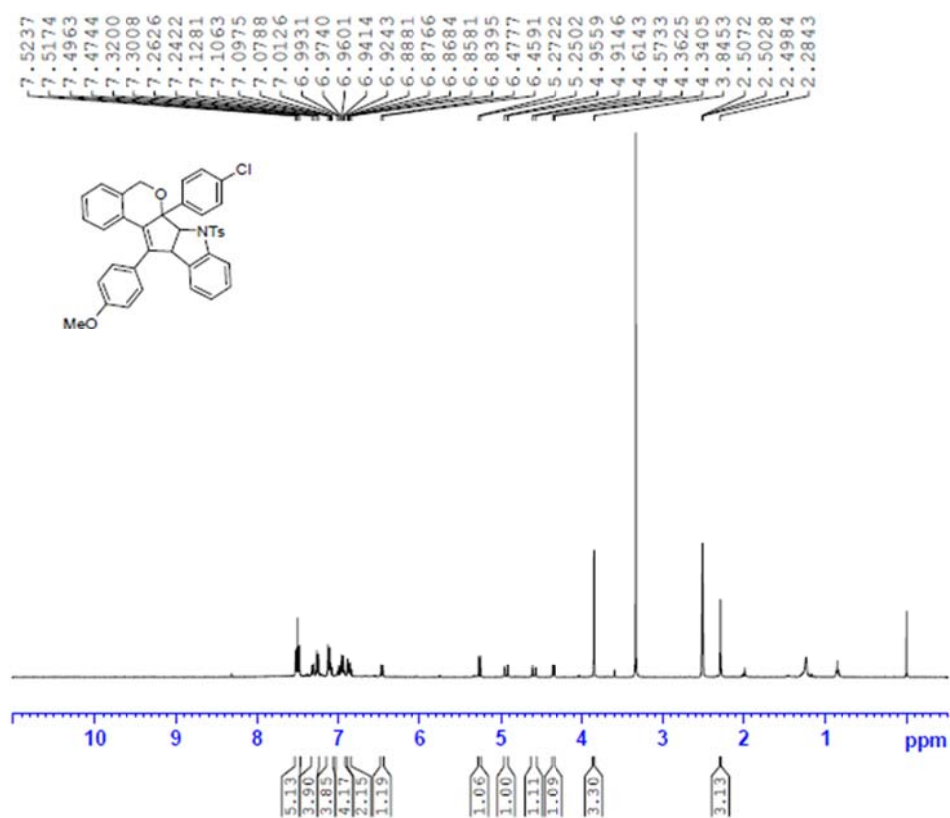

<sup>13</sup>C NMR of product **3j**

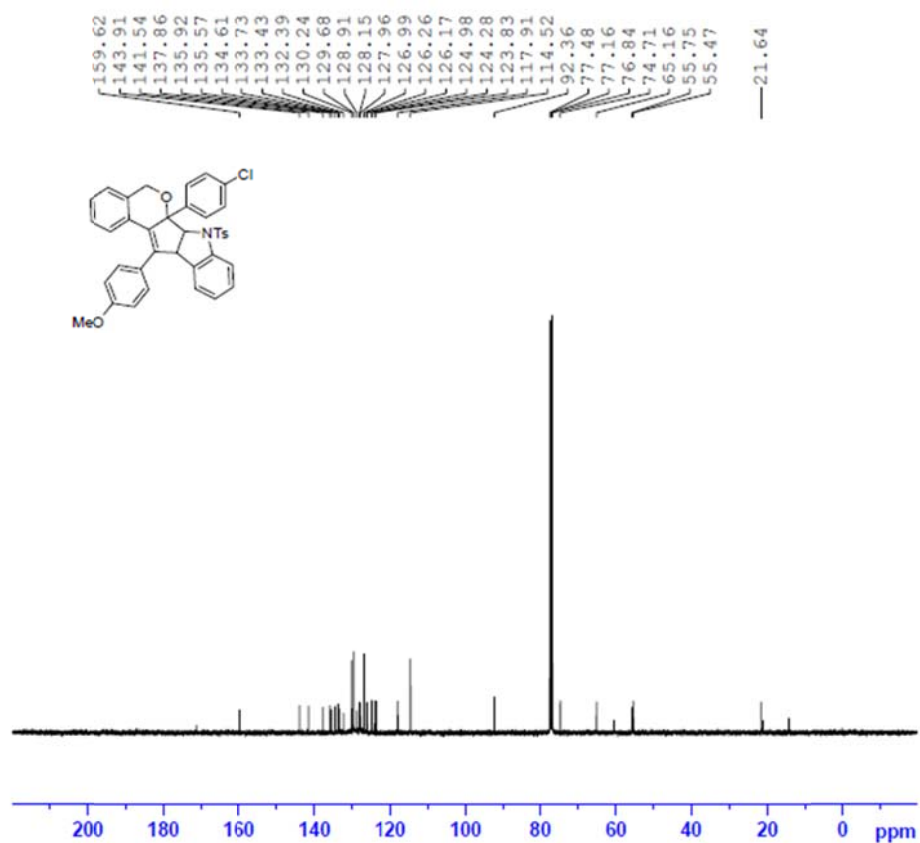

<sup>1</sup>H NMR of product **3k**

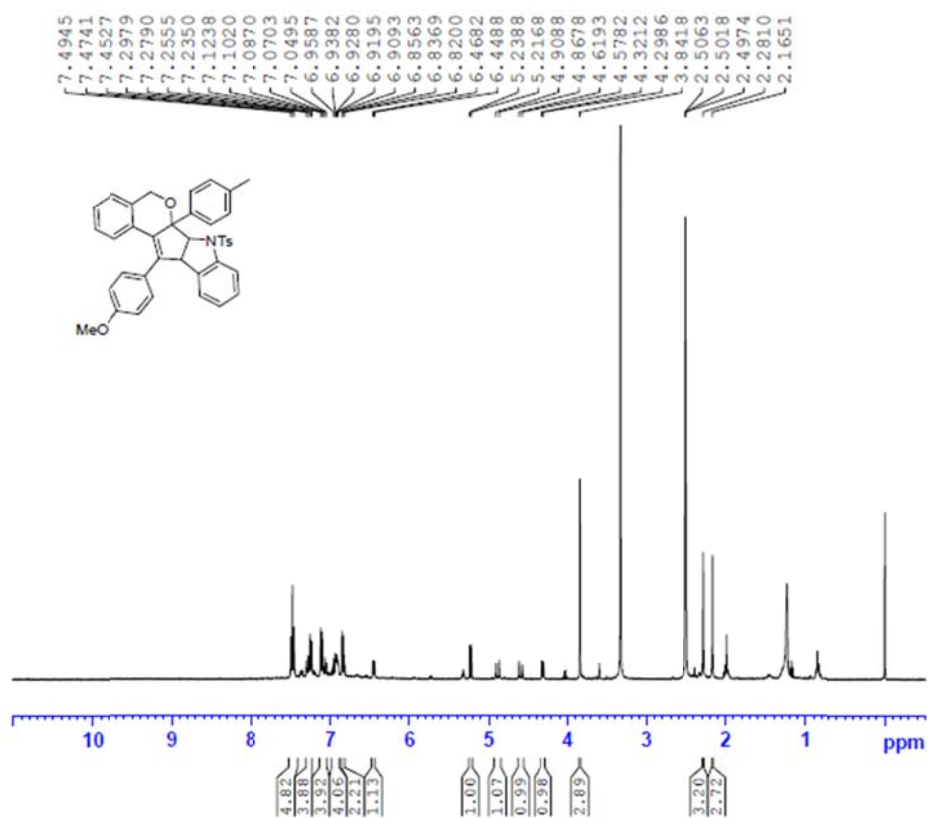

<sup>13</sup>C NMR of product **3k**

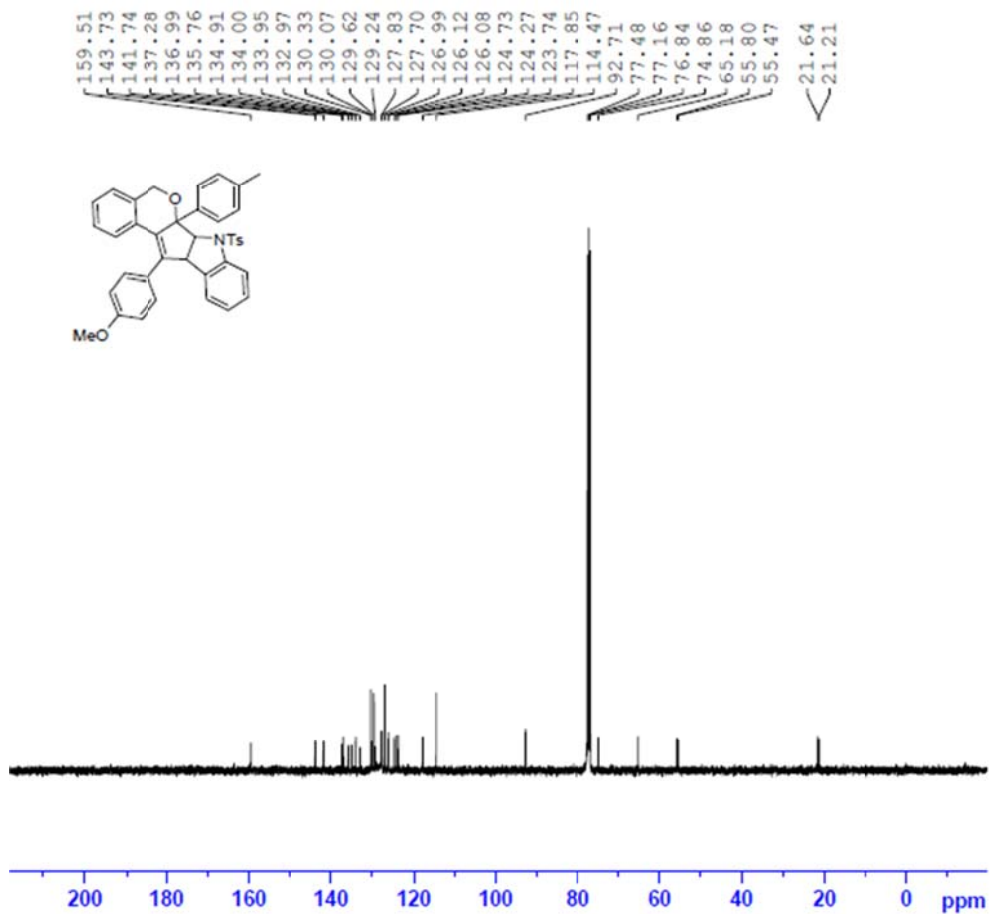

<sup>1</sup>H NMR of product **31**

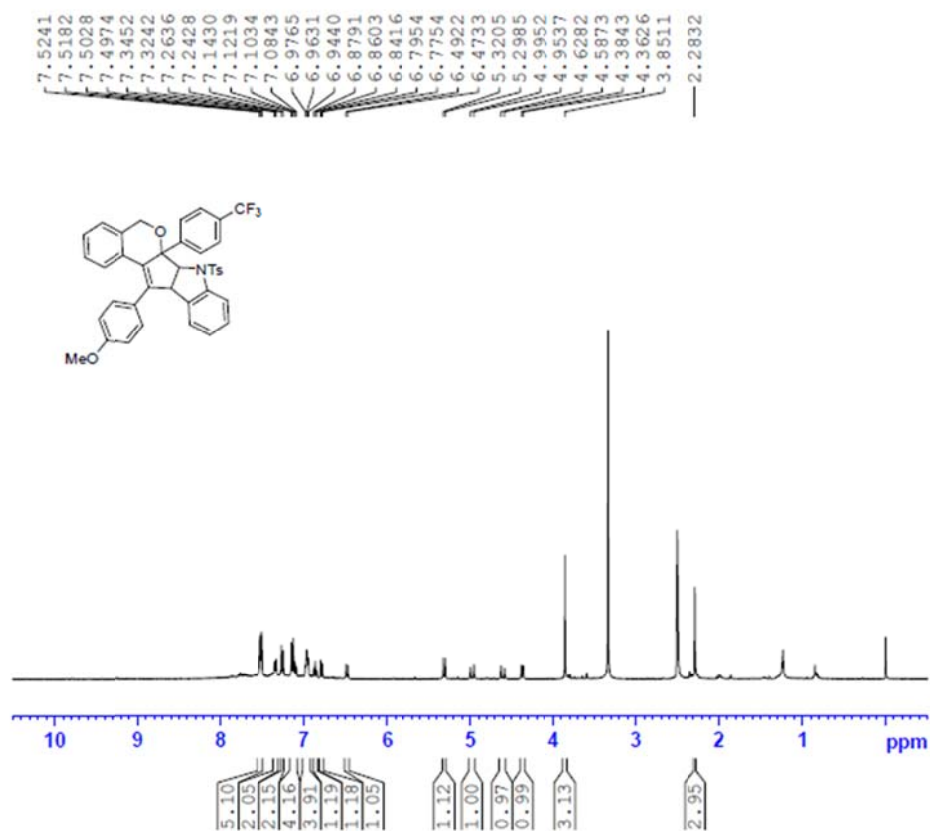

<sup>13</sup>C NMR of product **31**

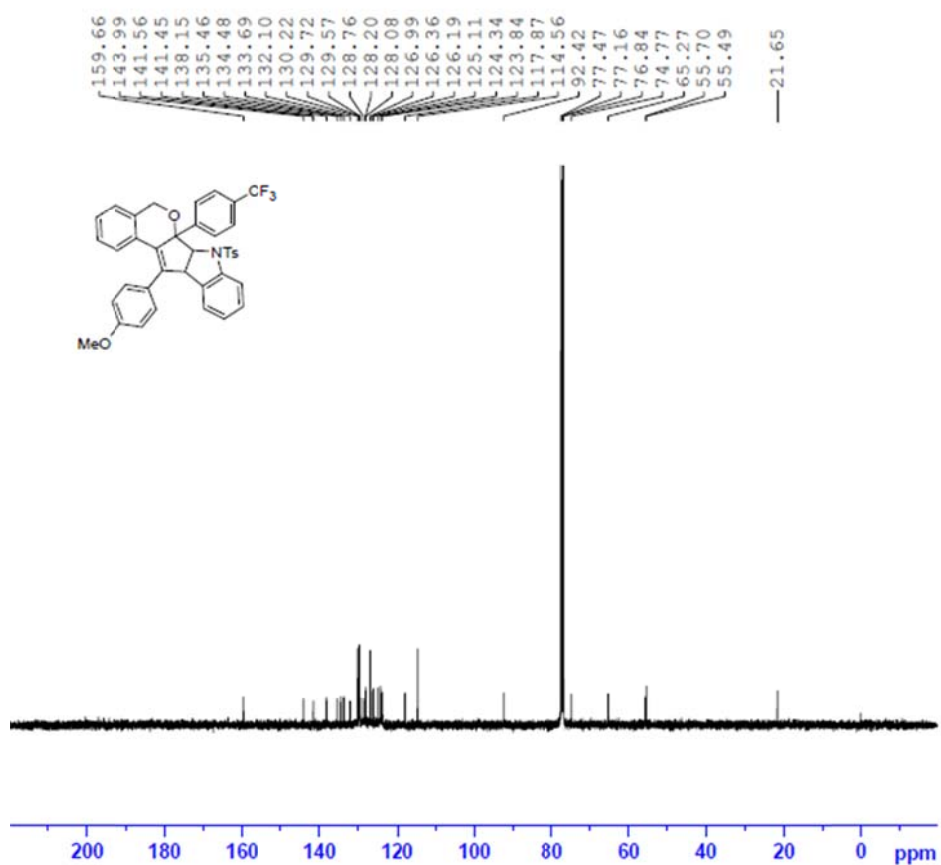



$^{19}\text{F}$  NMR of product **3l**

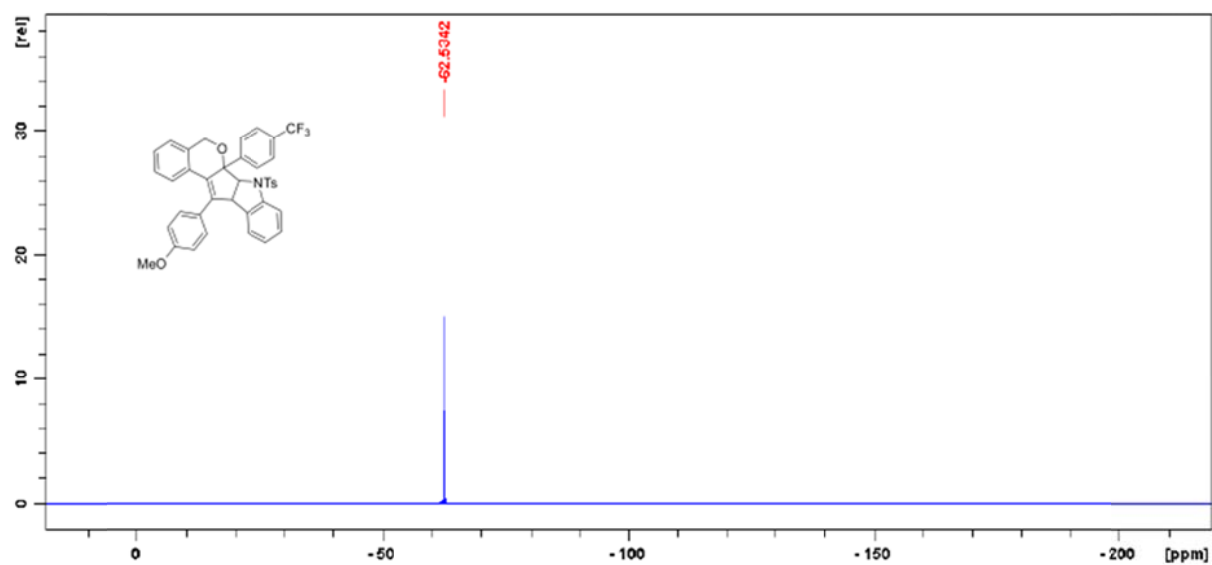

$^1\text{H}$  NMR of product **3m**

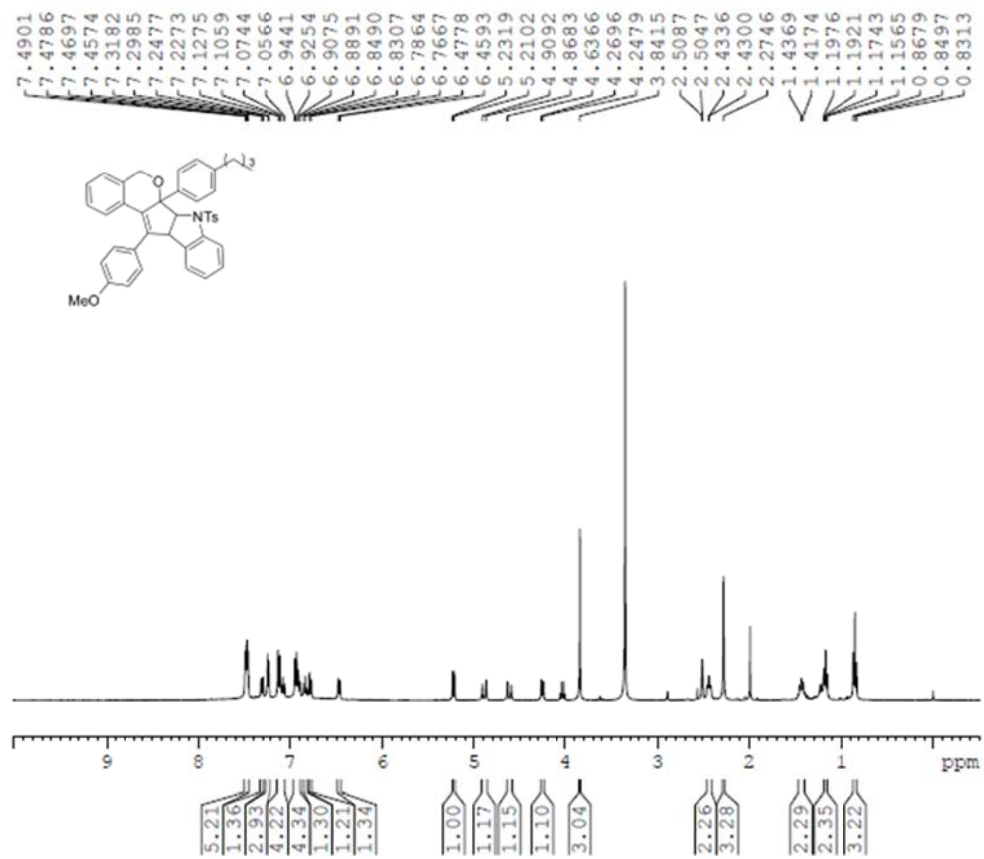

$^{13}\text{C}$  NMR of product **3m**

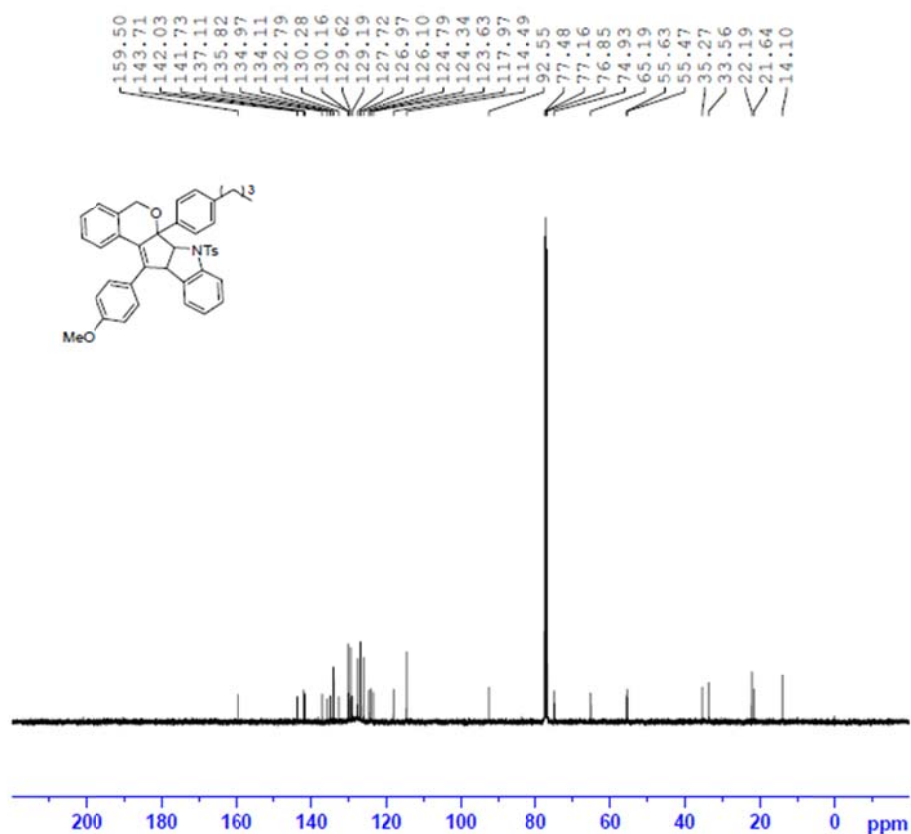

$^1\text{H}$  NMR of product **3n**

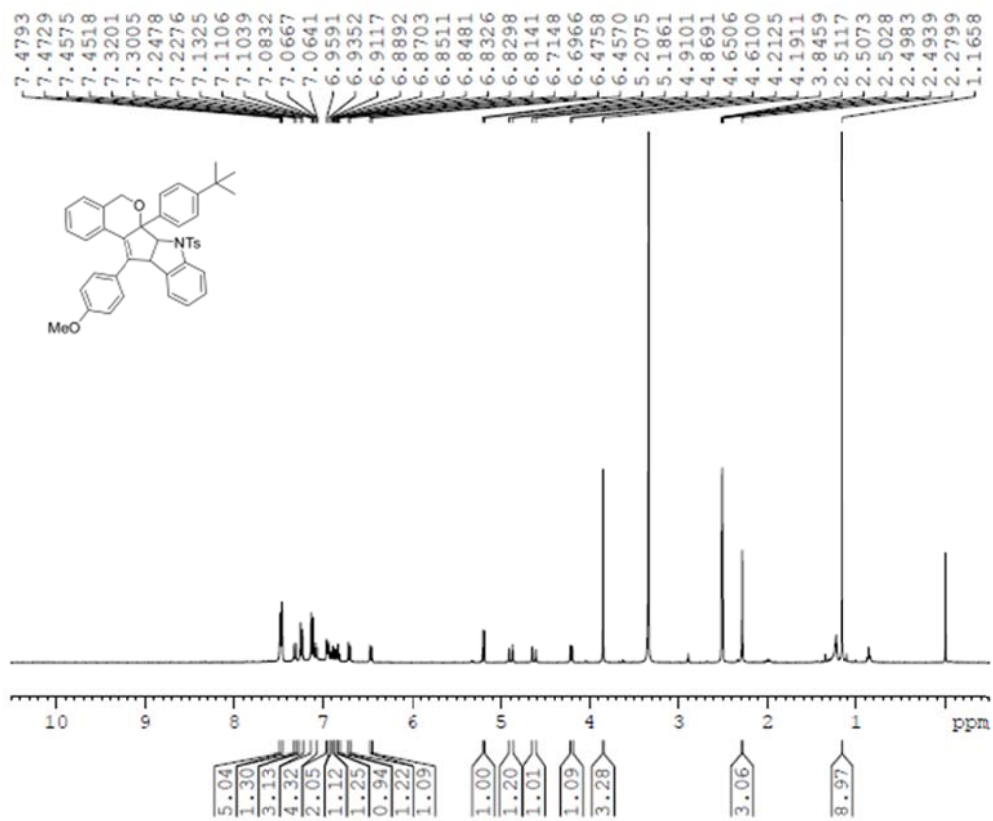

$^{13}\text{C}$  NMR of product **3n**

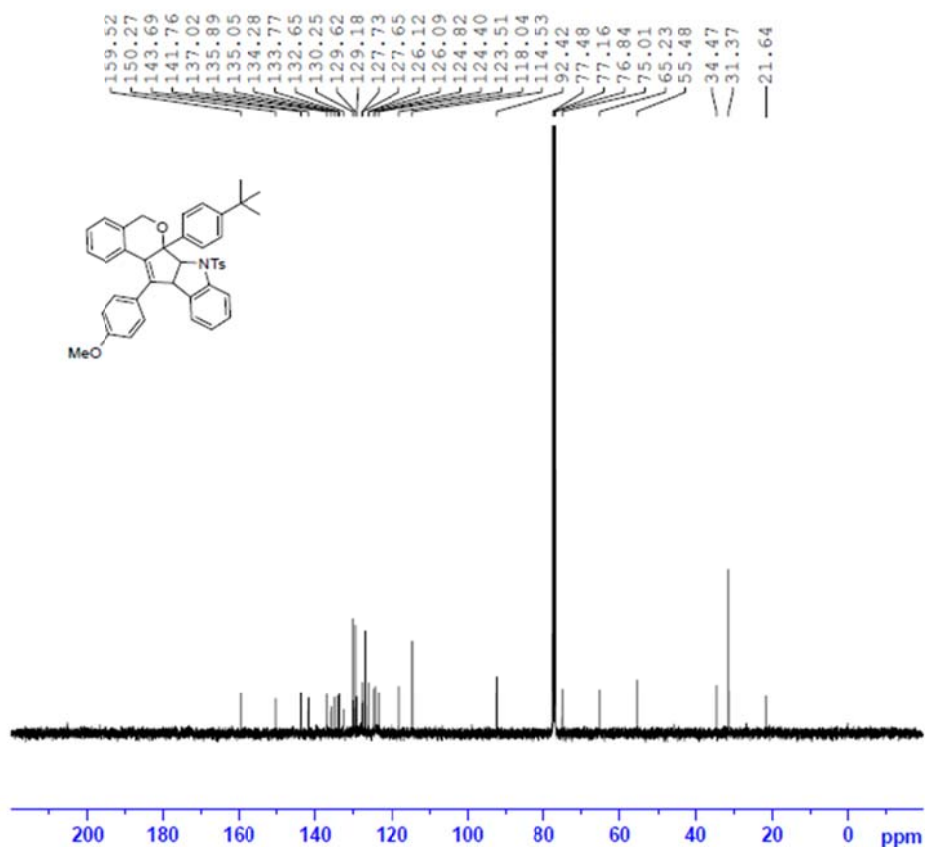

$^1\text{H}$  NMR of product **3o**

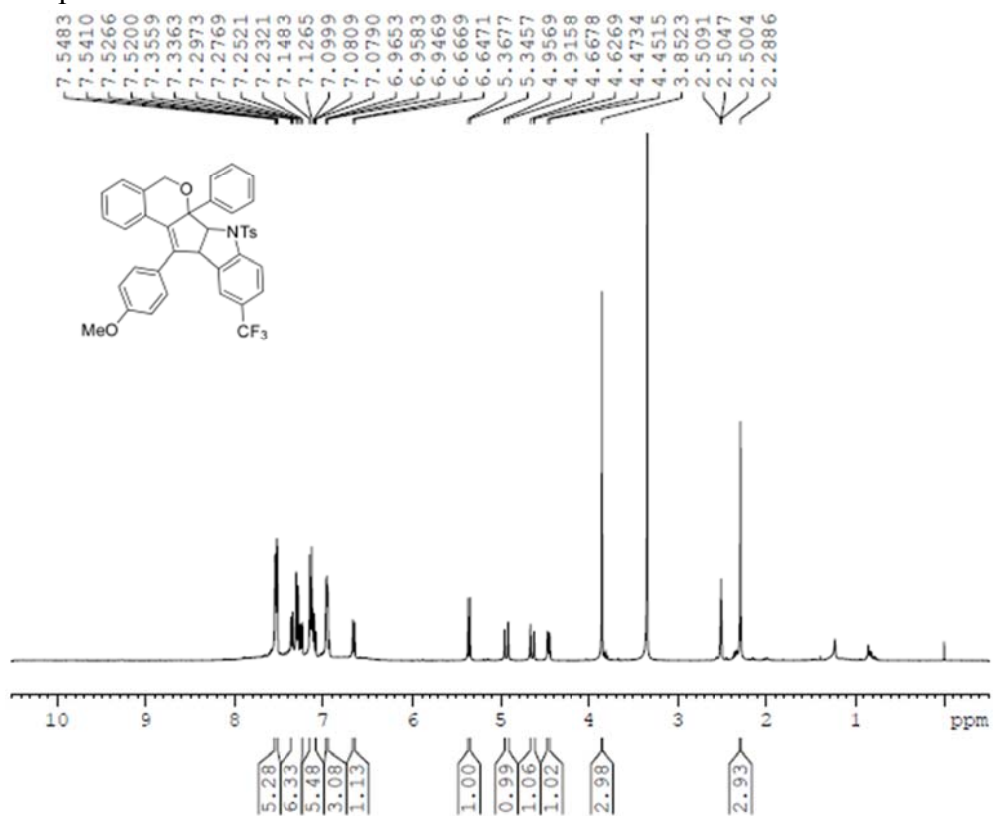

$^{13}\text{C}$  NMR of product **3o**

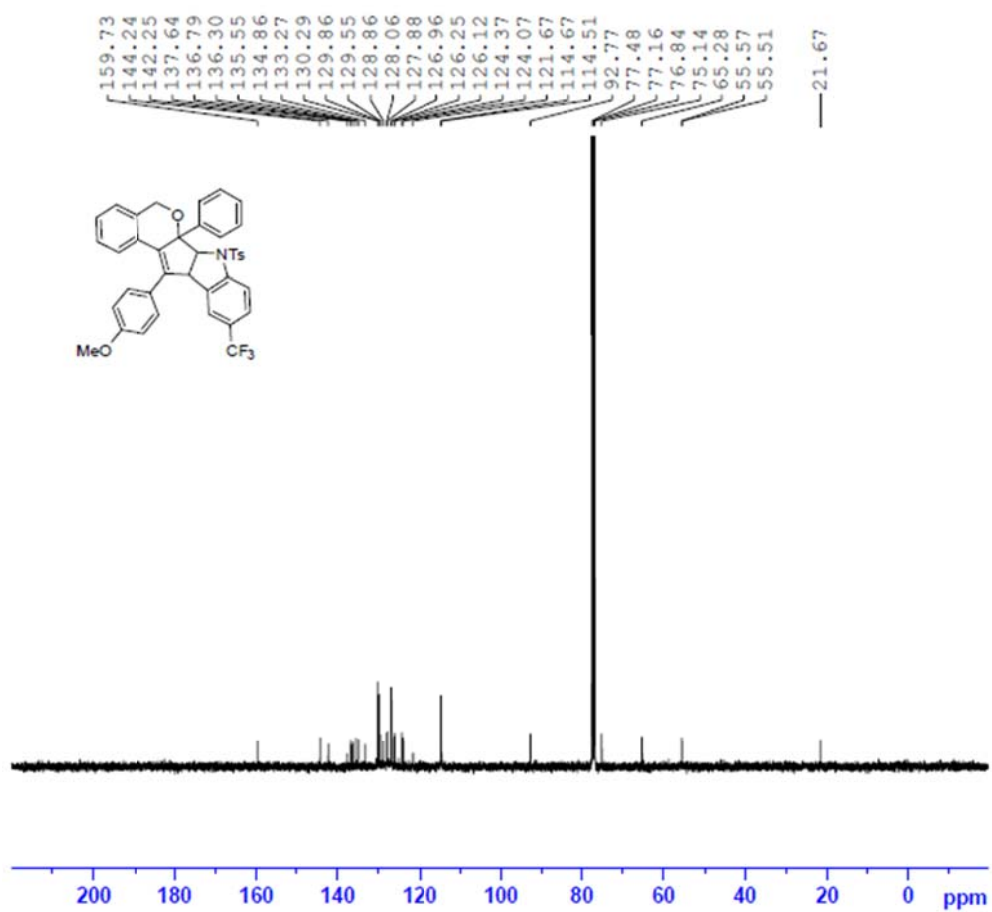

$^{19}\text{F}$  NMR of product **3o**

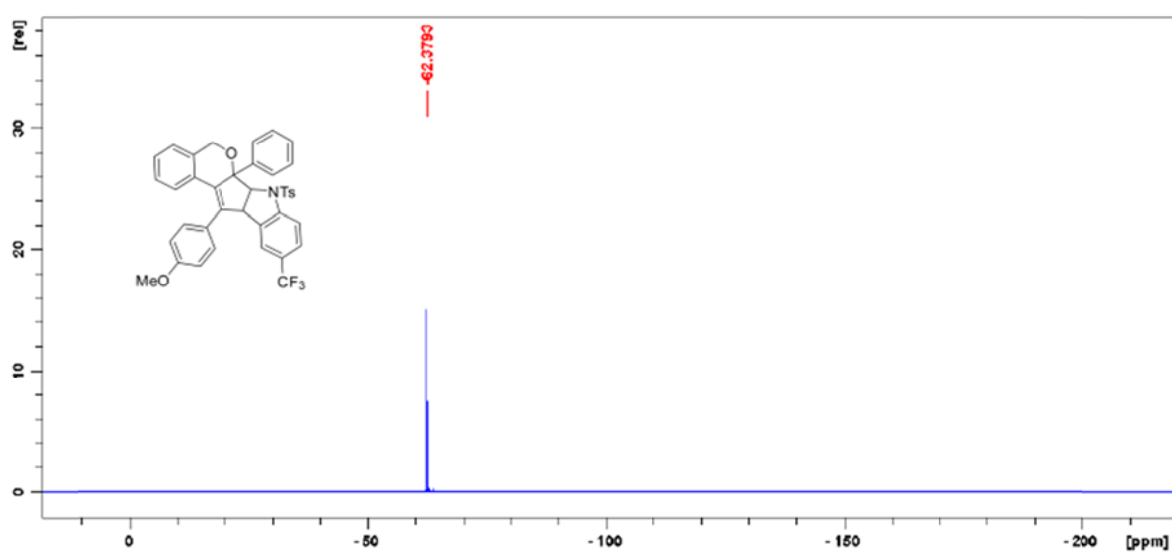

<sup>1</sup>H NMR of product **3p**

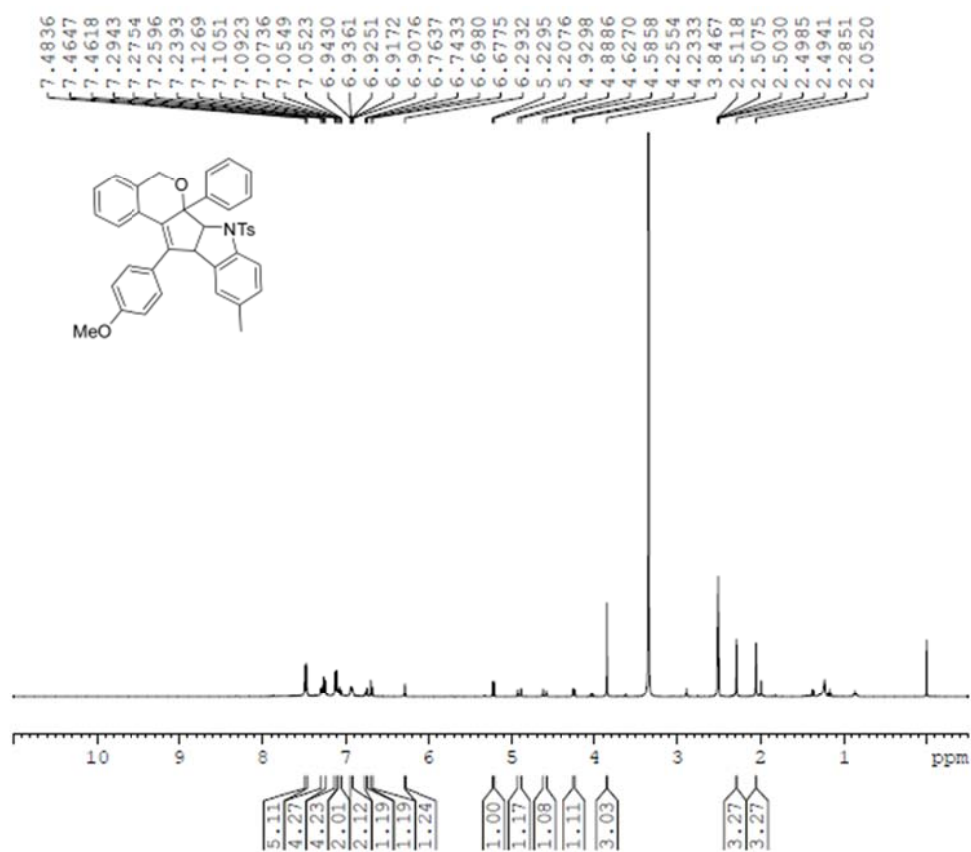

<sup>13</sup>C NMR of product **3p**

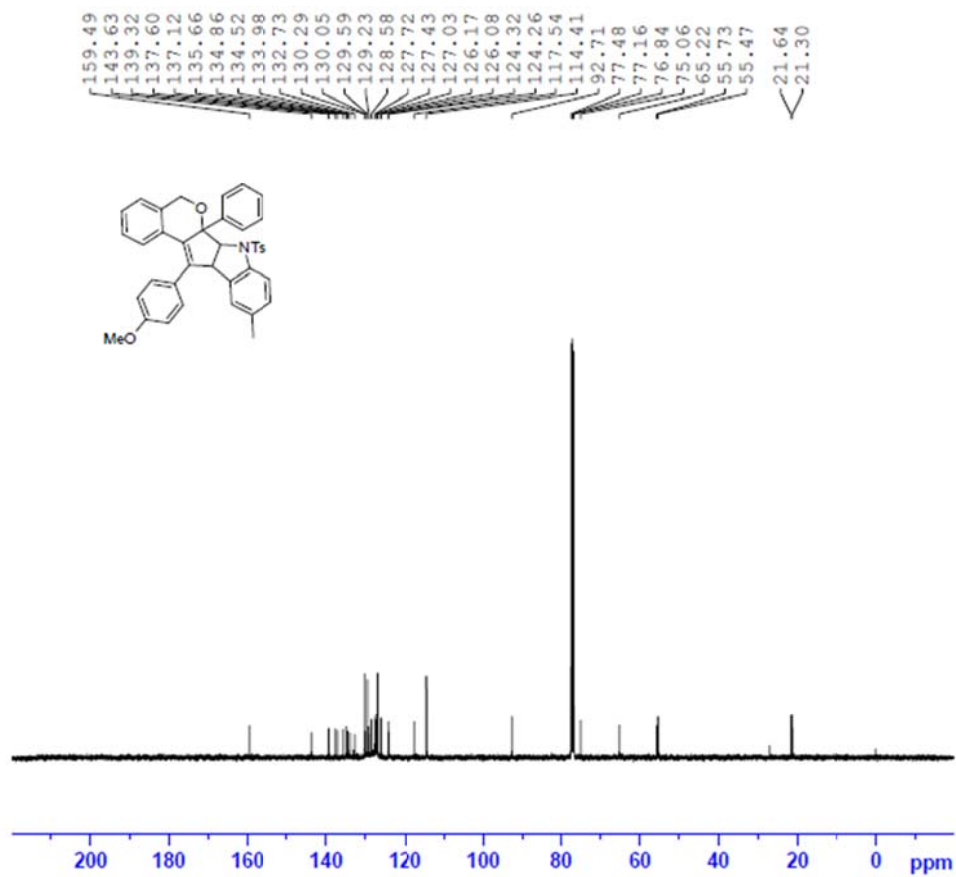

<sup>1</sup>H NMR of product **3q**

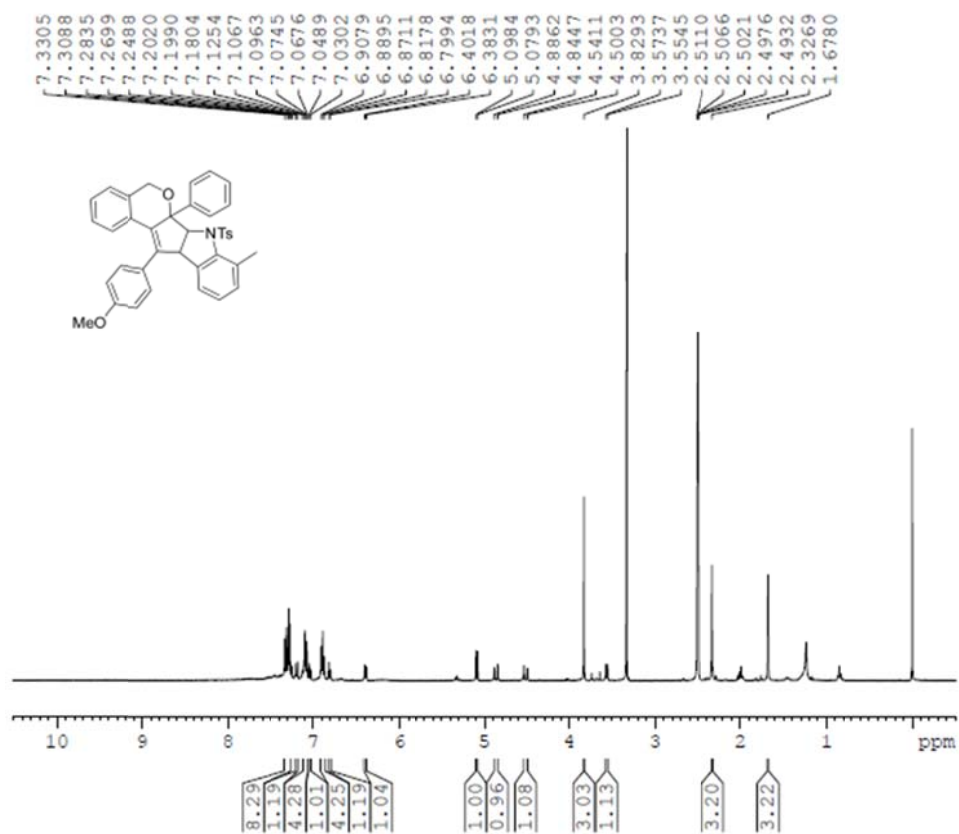

<sup>13</sup>C NMR of product **3q**

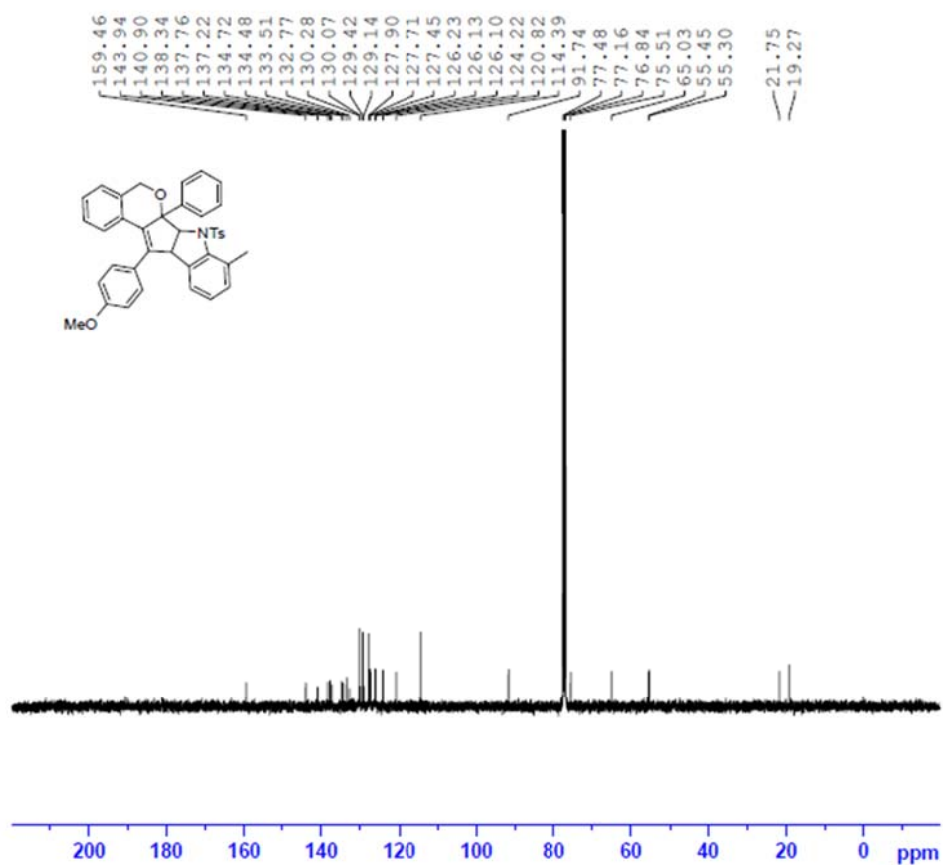

<sup>1</sup>H NMR of intermediate 4

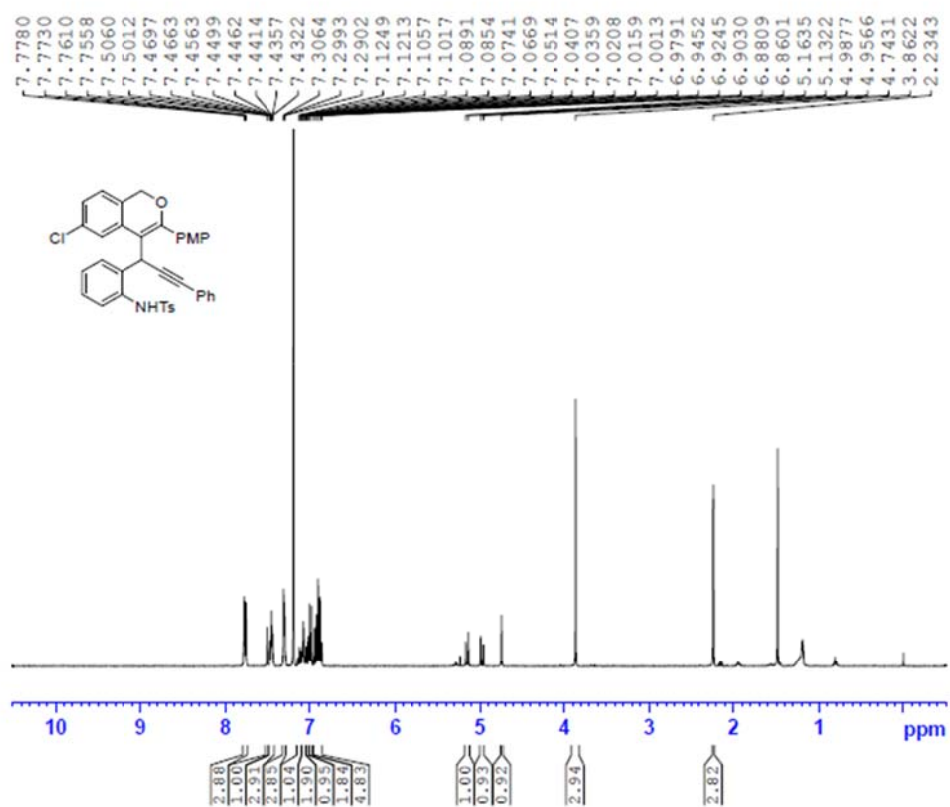

<sup>13</sup>C NMR of intermediate 4

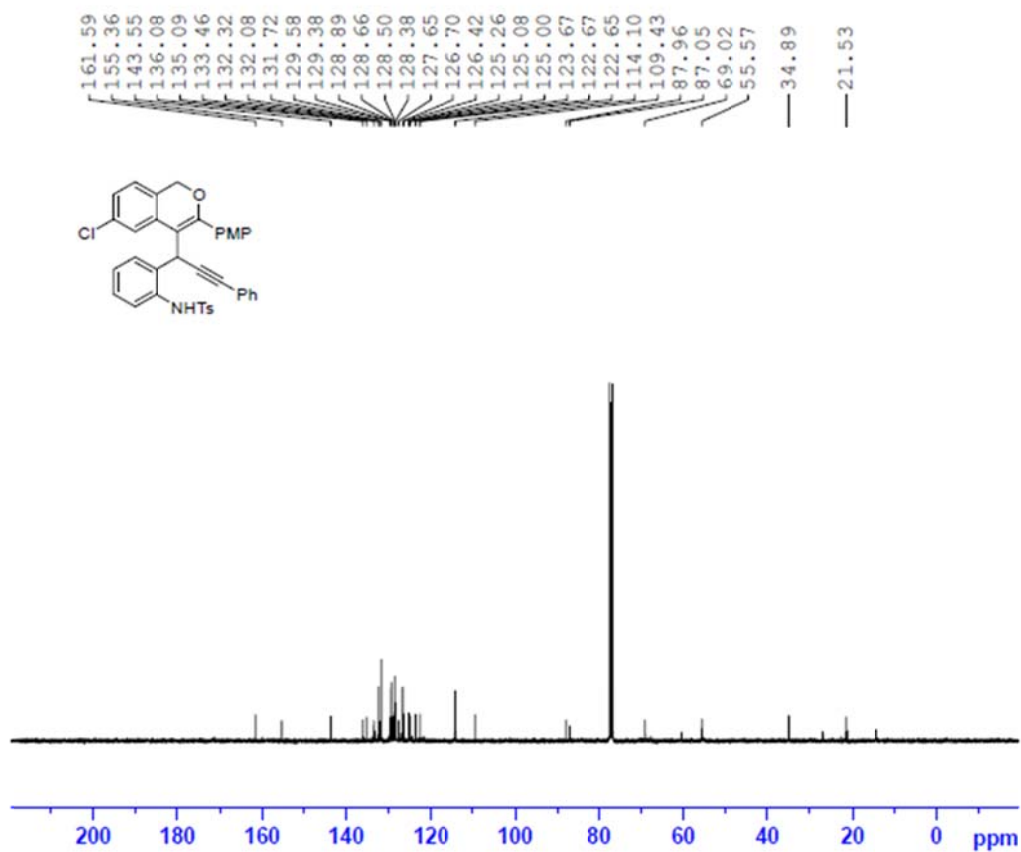

Supplement: c7cc04126h1.pdf [file c7cc04126h1.pdf]
